# Supplementary material for: Organisms with alternative genetic codes resolve unassigned codons via mistranslation and ribosomal rescue
Source: PubMed Central journal article supplement (PMC6207430; doi:10.7554/elife.34878), 2018-10-30

Raw file VOT16-1571 Scan 1044 Method FTMS; HCD Score 38.75 m/z 324.91

**Figure 2 – Supplement File 1**  
**Peptides detected through mass spectrometry**  
**Strain: GRO.DD**  
**Plasmid: [UAG-GFP]**  
**Spectrum 1**

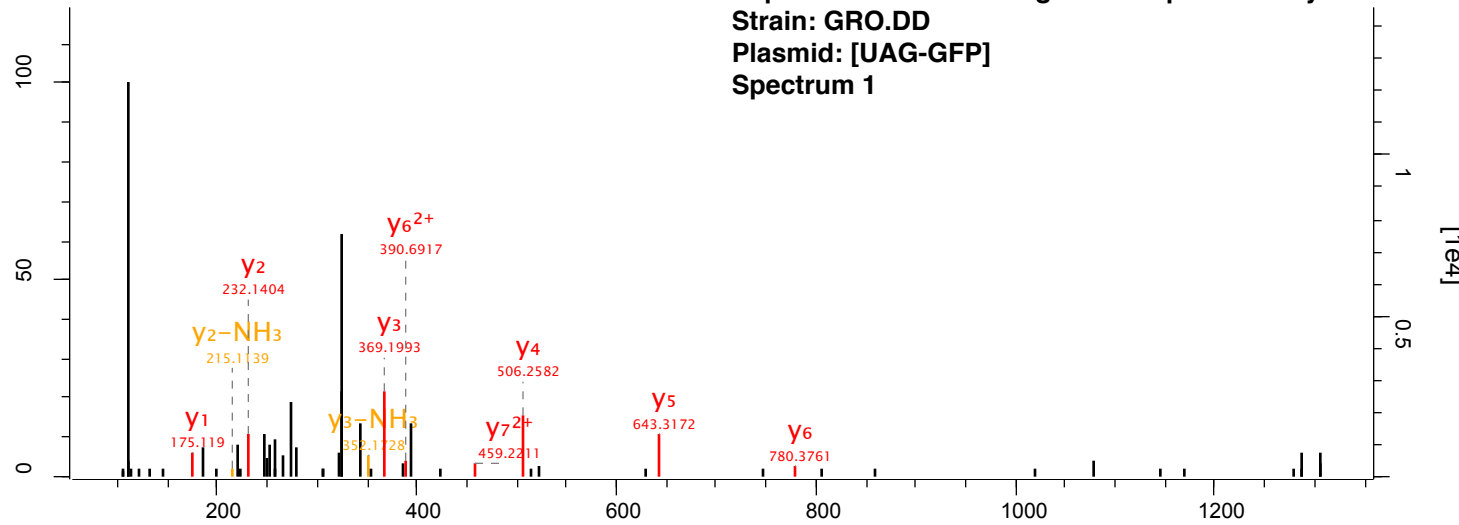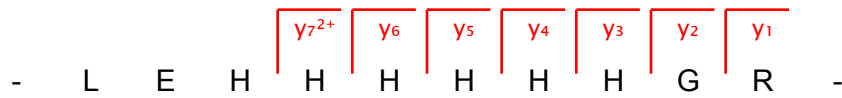

|            |      |           |       |        |
|------------|------|-----------|-------|--------|
| Raw file   | Scan | Method    | Score | m/z    |
| VOT16-1571 | 1049 | FTMS; HCD | 37.34 | 342.67 |

**Figure 2 – Supplement File 1**  
**Peptides detected through mass spectrometry**  
**Strain: GRO.DD**  
**Plasmid: [UAG-GFP]**  
**Spectrum 2**

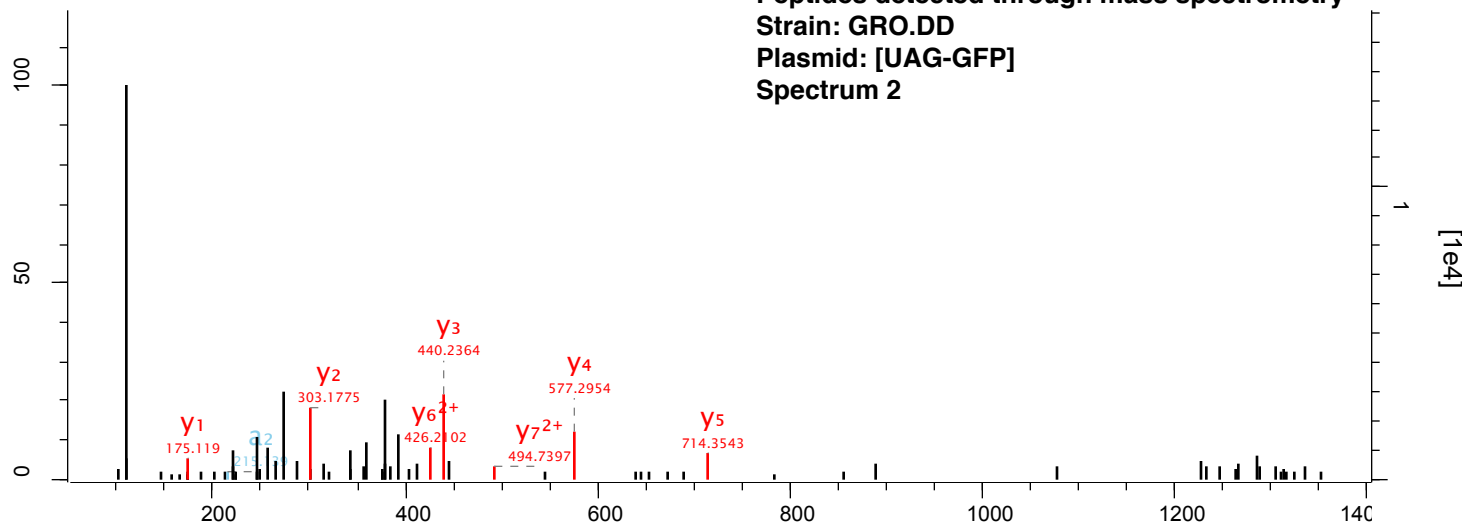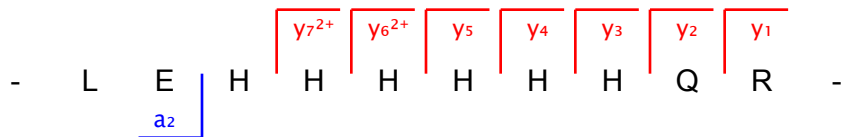

Raw file VOT16-1571 Scan 1057 Method FTMS; HCD Score 77.66 m/z 374.68

**Figure 2 – Supplement File 1**  
**Peptides detected through mass spectrometry**  
**Strain: GRO.DD**  
**Plasmid: [UAG-GFP]**  
**Spectrum 3**

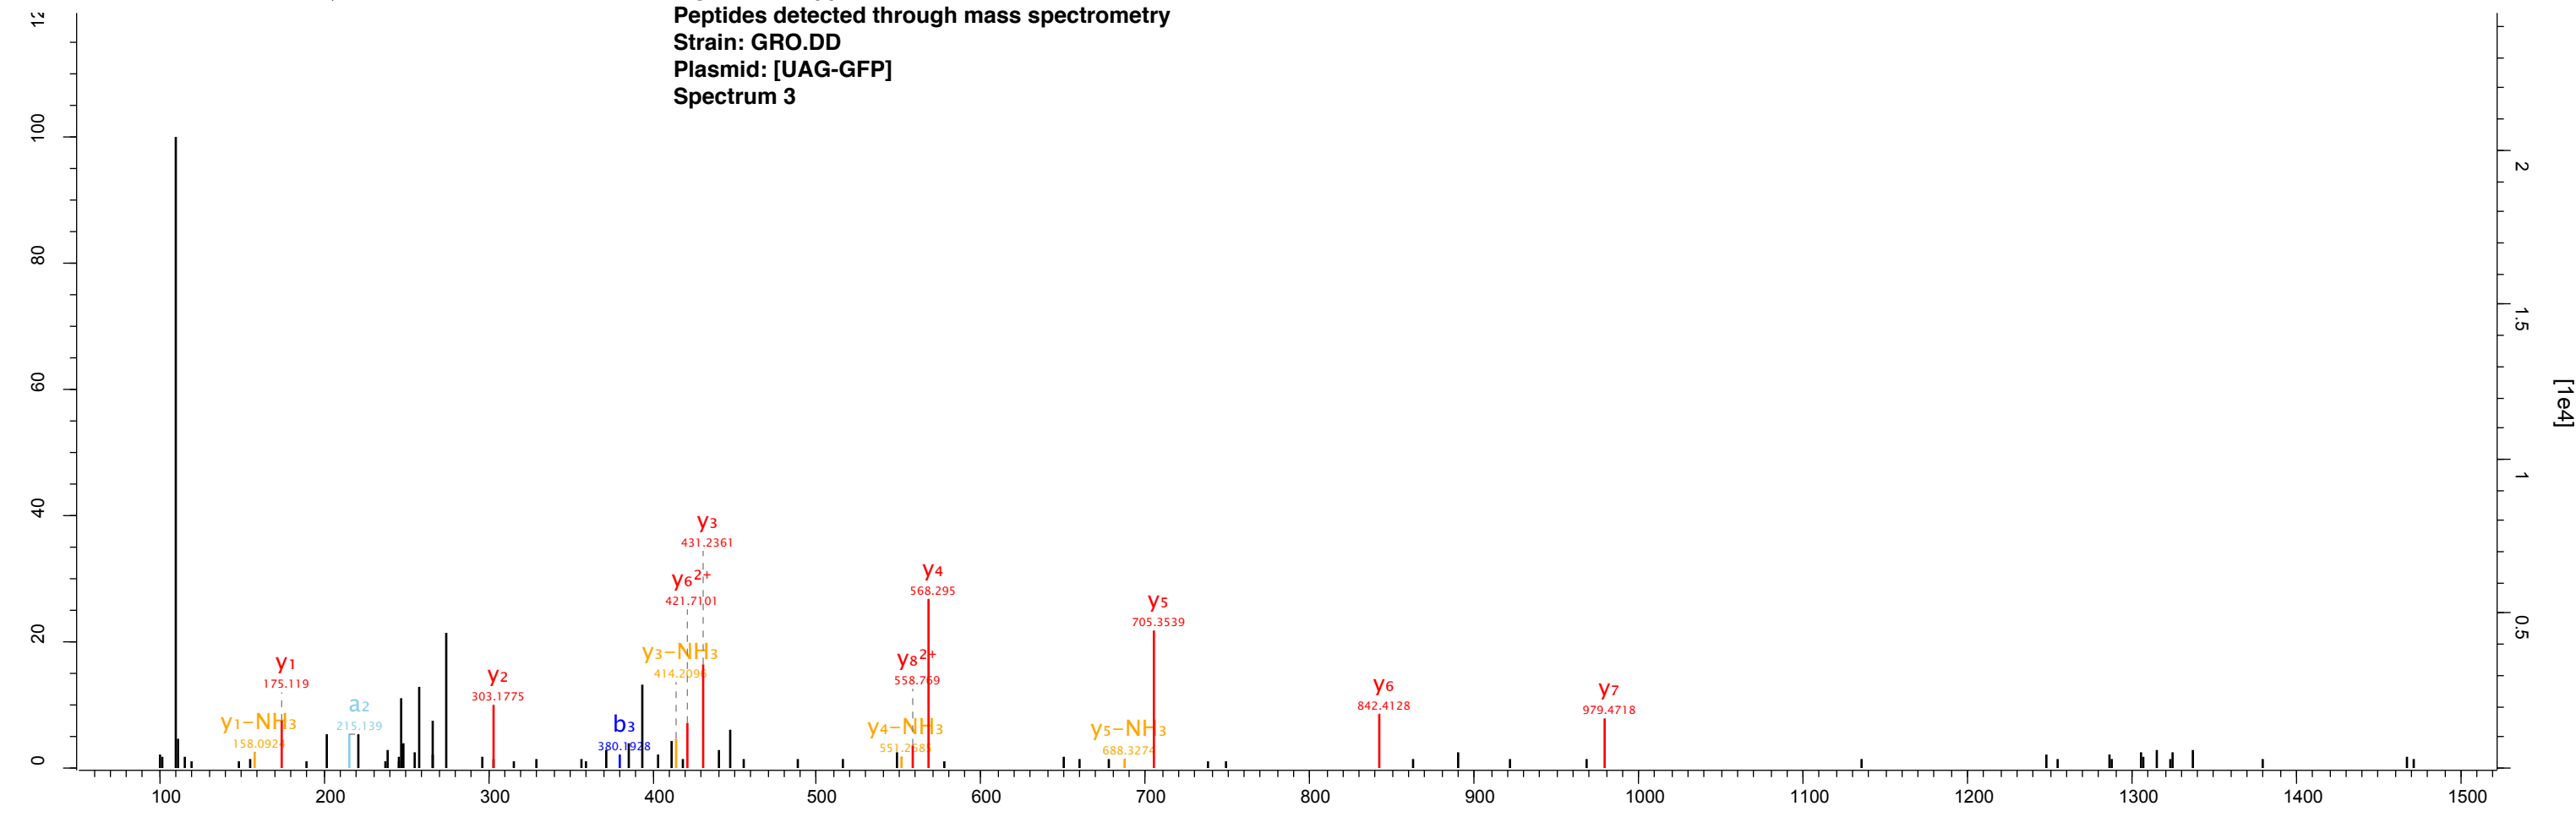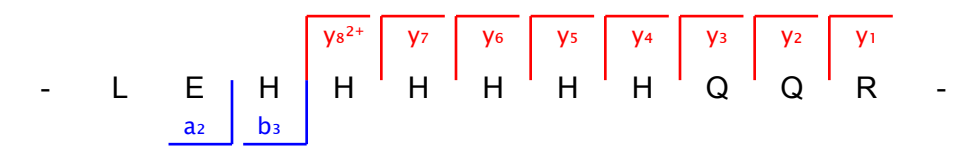

|            |      |           |       |        |
|------------|------|-----------|-------|--------|
| Raw file   | Scan | Method    | Score | m/z    |
| VOT16-1571 | 1057 | FTMS; HCD | 70.94 | 374.68 |

**Figure 2 – Supplement File 1**  
**Peptides detected through mass spectrometry**  
**Strain: GRO.DD**  
**Plasmid: [UAG-GFP]**  
**Spectrum 4**

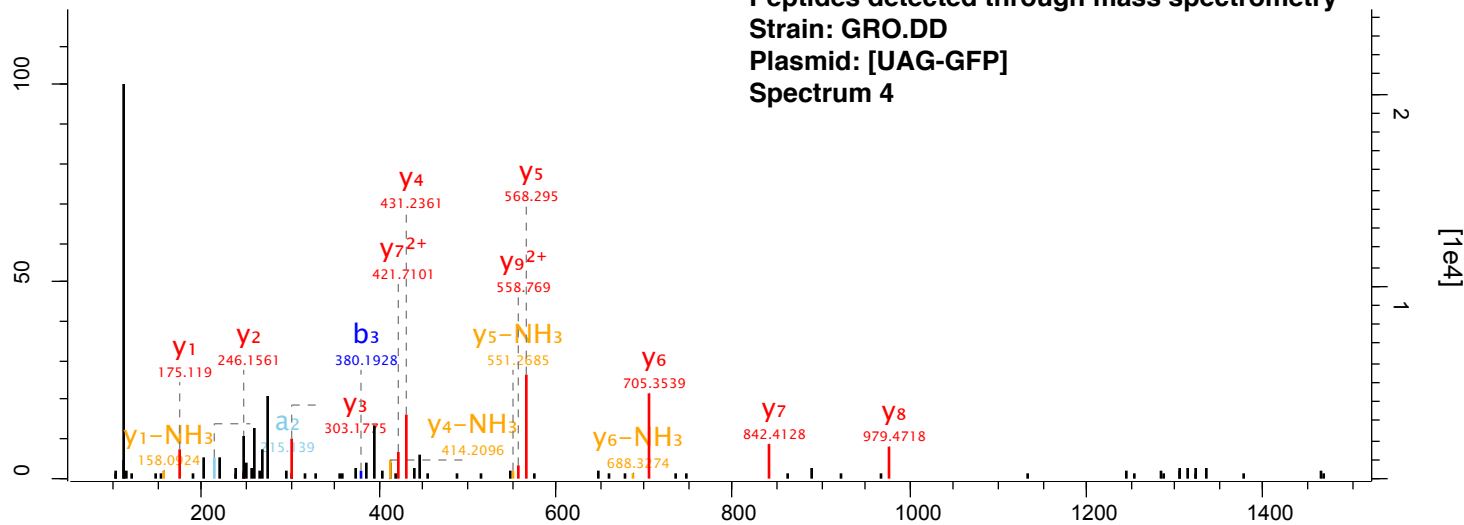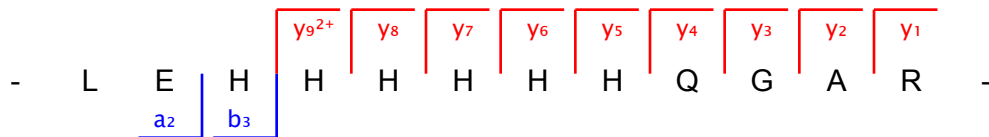

| Raw file   | Scan | Method    | Score | m/z    |
|------------|------|-----------|-------|--------|
| VOT16-1571 | 1147 | FTMS; HCD | 32.05 | 353.93 |

**Figure 2 – Supplement File 1**  
**Peptides detected through mass spectrometry**  
**Strain: GRO.DD**  
**Plasmid: [UAG-GFP]**  
**Spectrum 5**

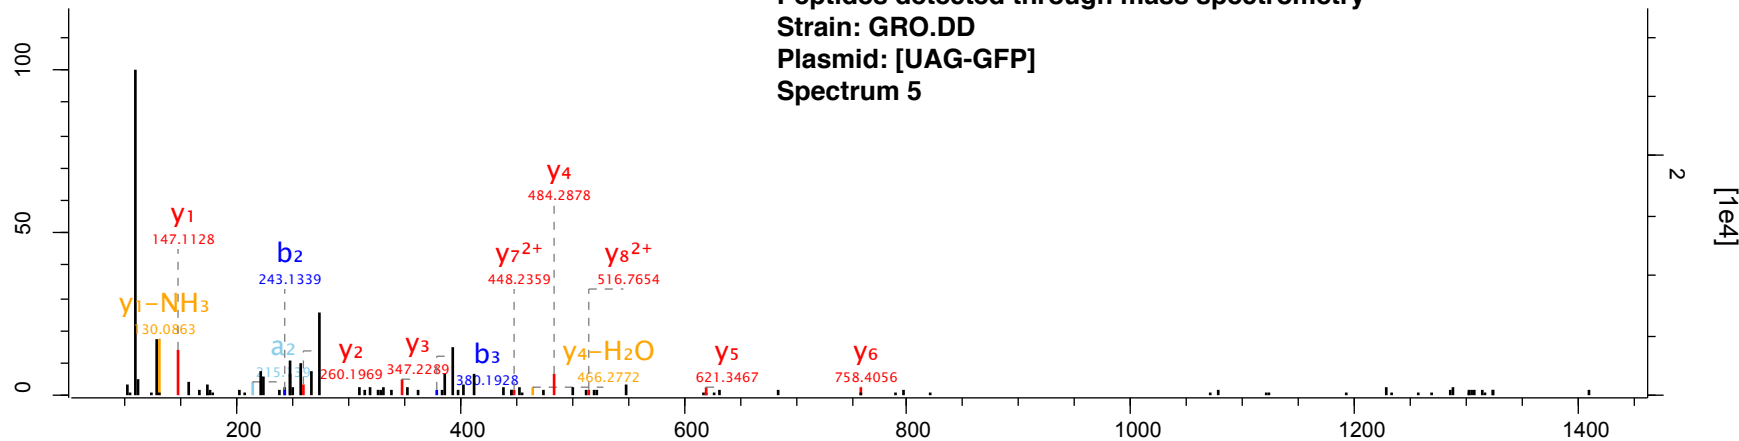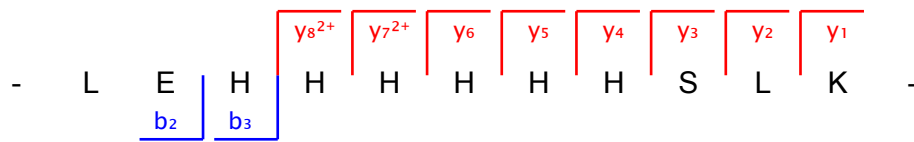

Raw file Scan Method Score m/z  
 VOT16-1571 1160 FTMS; HCD 62.8 383.44

**Figure 2 – Supplement File 1**  
**Peptides detected through mass spectrometry**  
**Strain: GRO.DD**  
**Plasmid: [UAG-GFP]**  
**Spectrum 6**

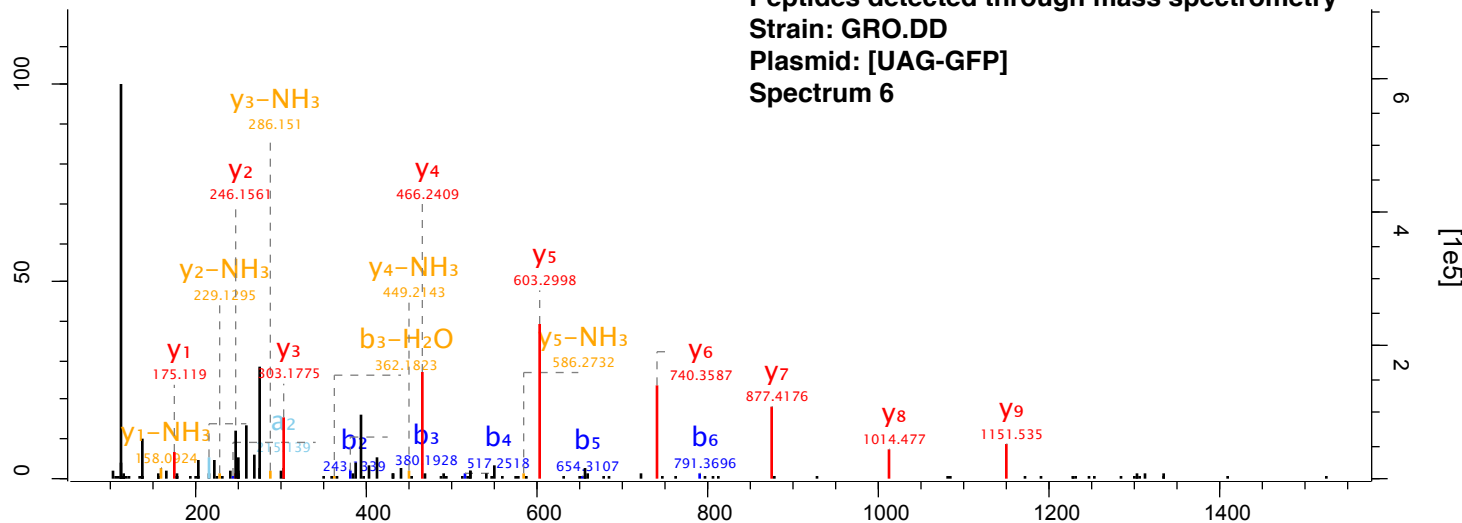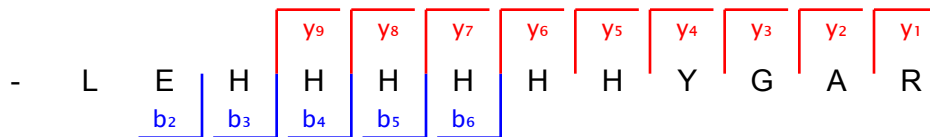

Raw file VOT16-1571 Scan 1161 Method FTMS; HCD Score 151.22 m/z 510.91

**Figure 2 – Supplement File 1**  
**Peptides detected through mass spectrometry**  
**Strain: GRO.DD**  
**Plasmid: [UAG-GFP]**  
**Spectrum 7**

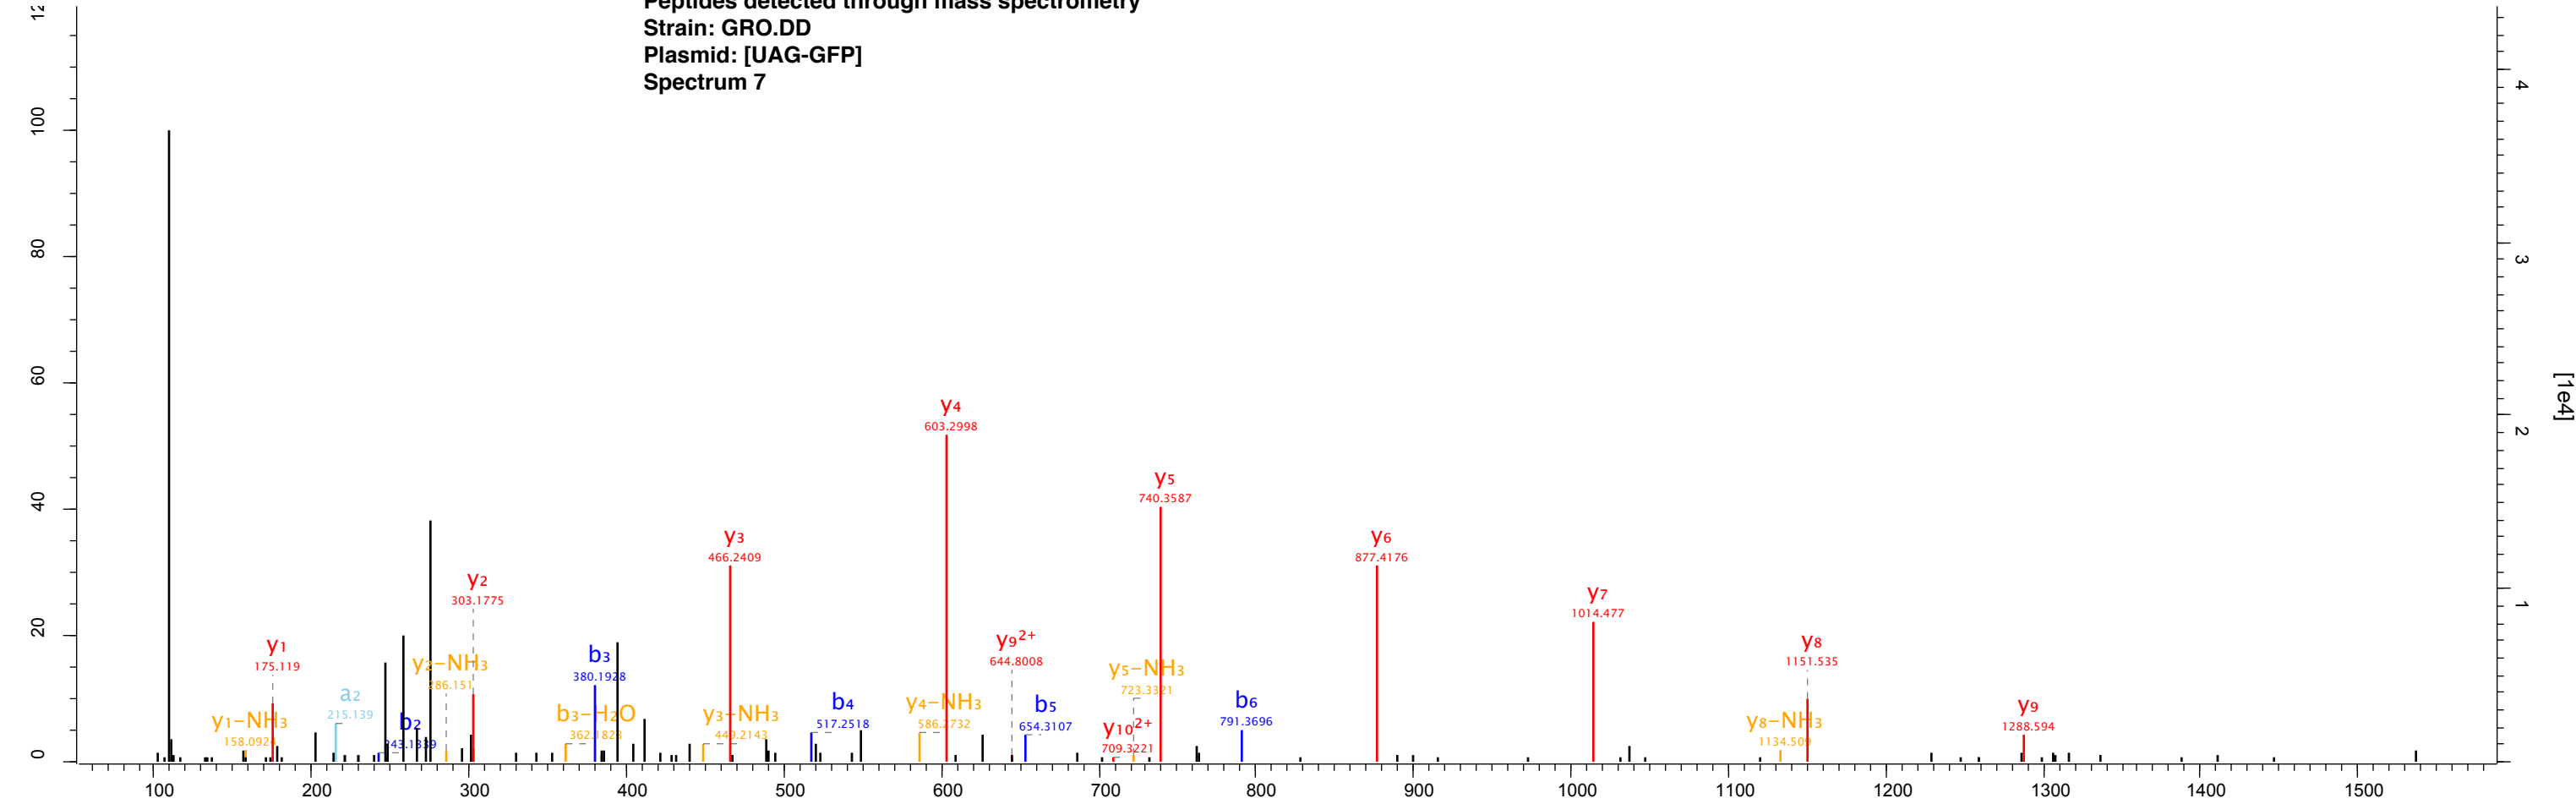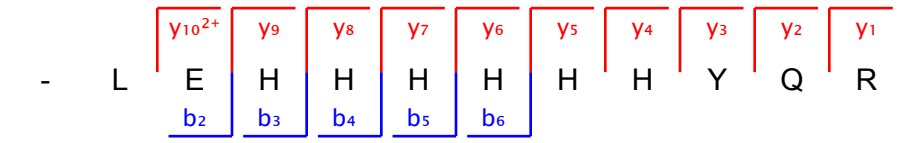

Raw file Scan Method Score m/z  
 VOT16-1571 1161 FTMS; HCD 141.1 510.91

**Figure 2 – Supplement File 1**  
**Peptides detected through mass spectrometry**  
**Strain: GRO.DD**  
**Plasmid: [UAG-GFP]**  
**Spectrum 8**

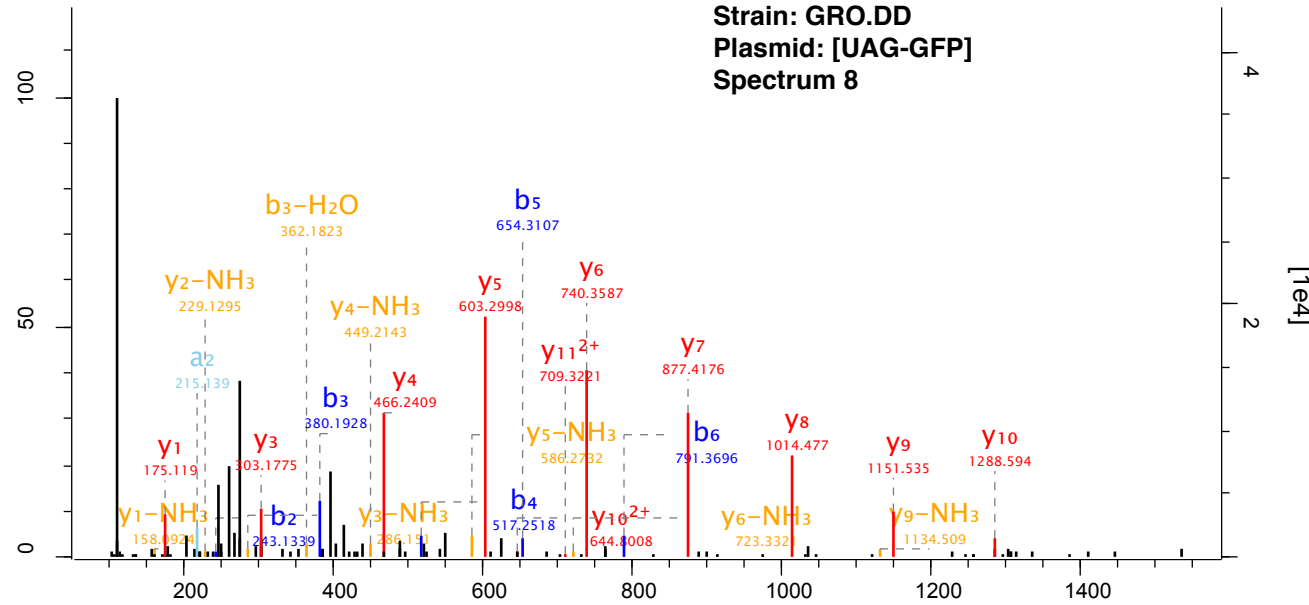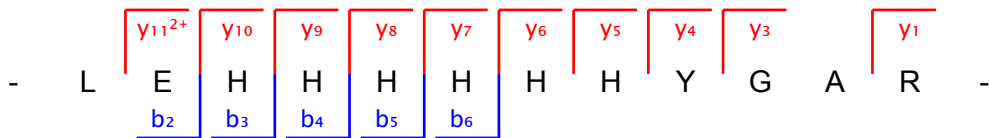



Raw file VOT16-1571 Scan 1286 Method FTMS; HCD Score 47.3 m/z 353.18

**Figure 2 – Supplement File 1**  
**Peptides detected through mass spectrometry**  
**Strain: GRO.DD**  
**Plasmid: [UAG-GFP]**  
**Spectrum 9**

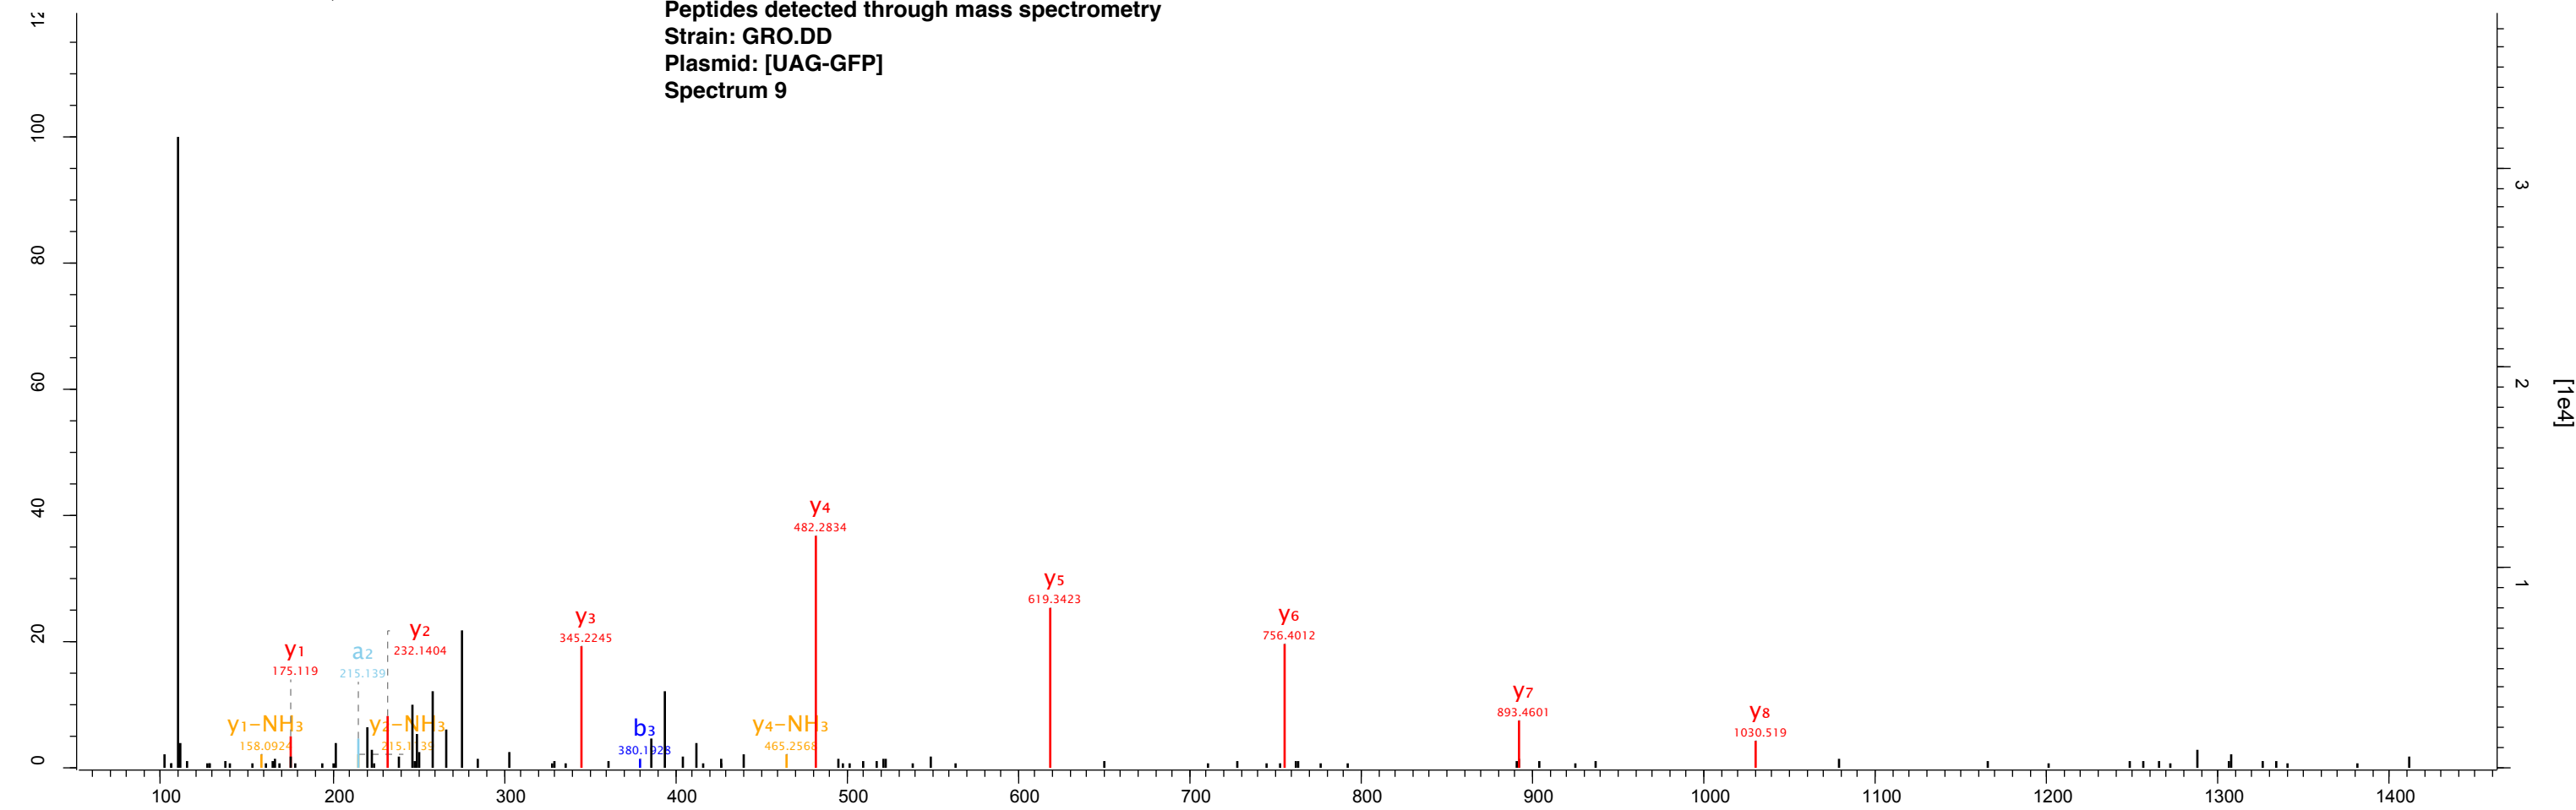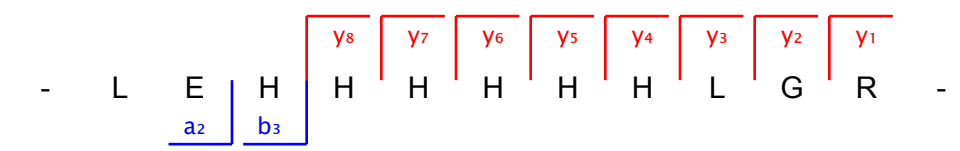

Raw file Scan Method Score m/z  
 VOT16-1571 1286 FTMS; HCD 47.3 353.18

**Figure 2 – Supplement File 1**  
**Peptides detected through mass spectrometry**  
**Strain: GRO.DD**  
**Plasmid: [UAG-GFP]**  
**Spectrum 10**

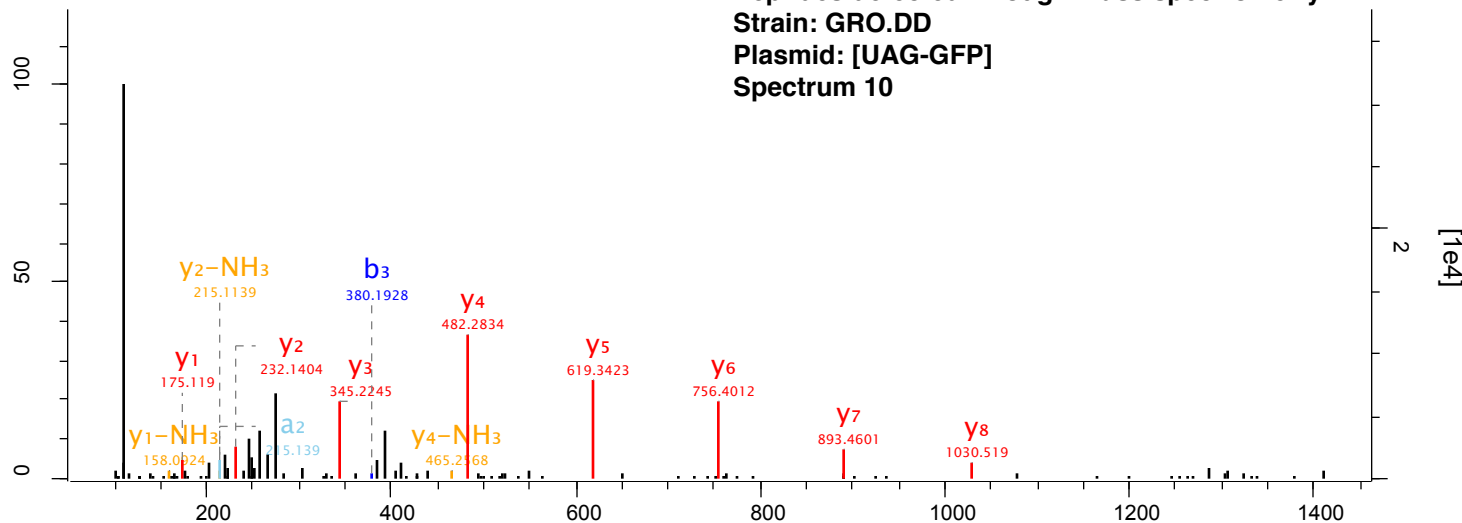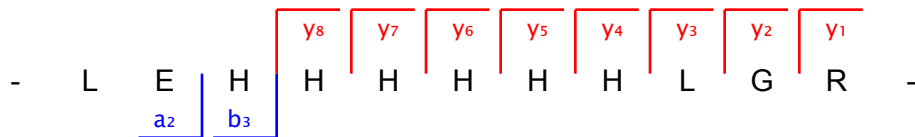

Raw file VOT16-1571 Scan 1298 Method FTMS; HCD Score 80.24 m/z 383.44

**Figure 2 – Supplement File 1**  
**Peptides detected through mass spectrometry**  
**Strain: GRO.DD**  
**Plasmid: [UAG-GFP]**  
**Spectrum 11**

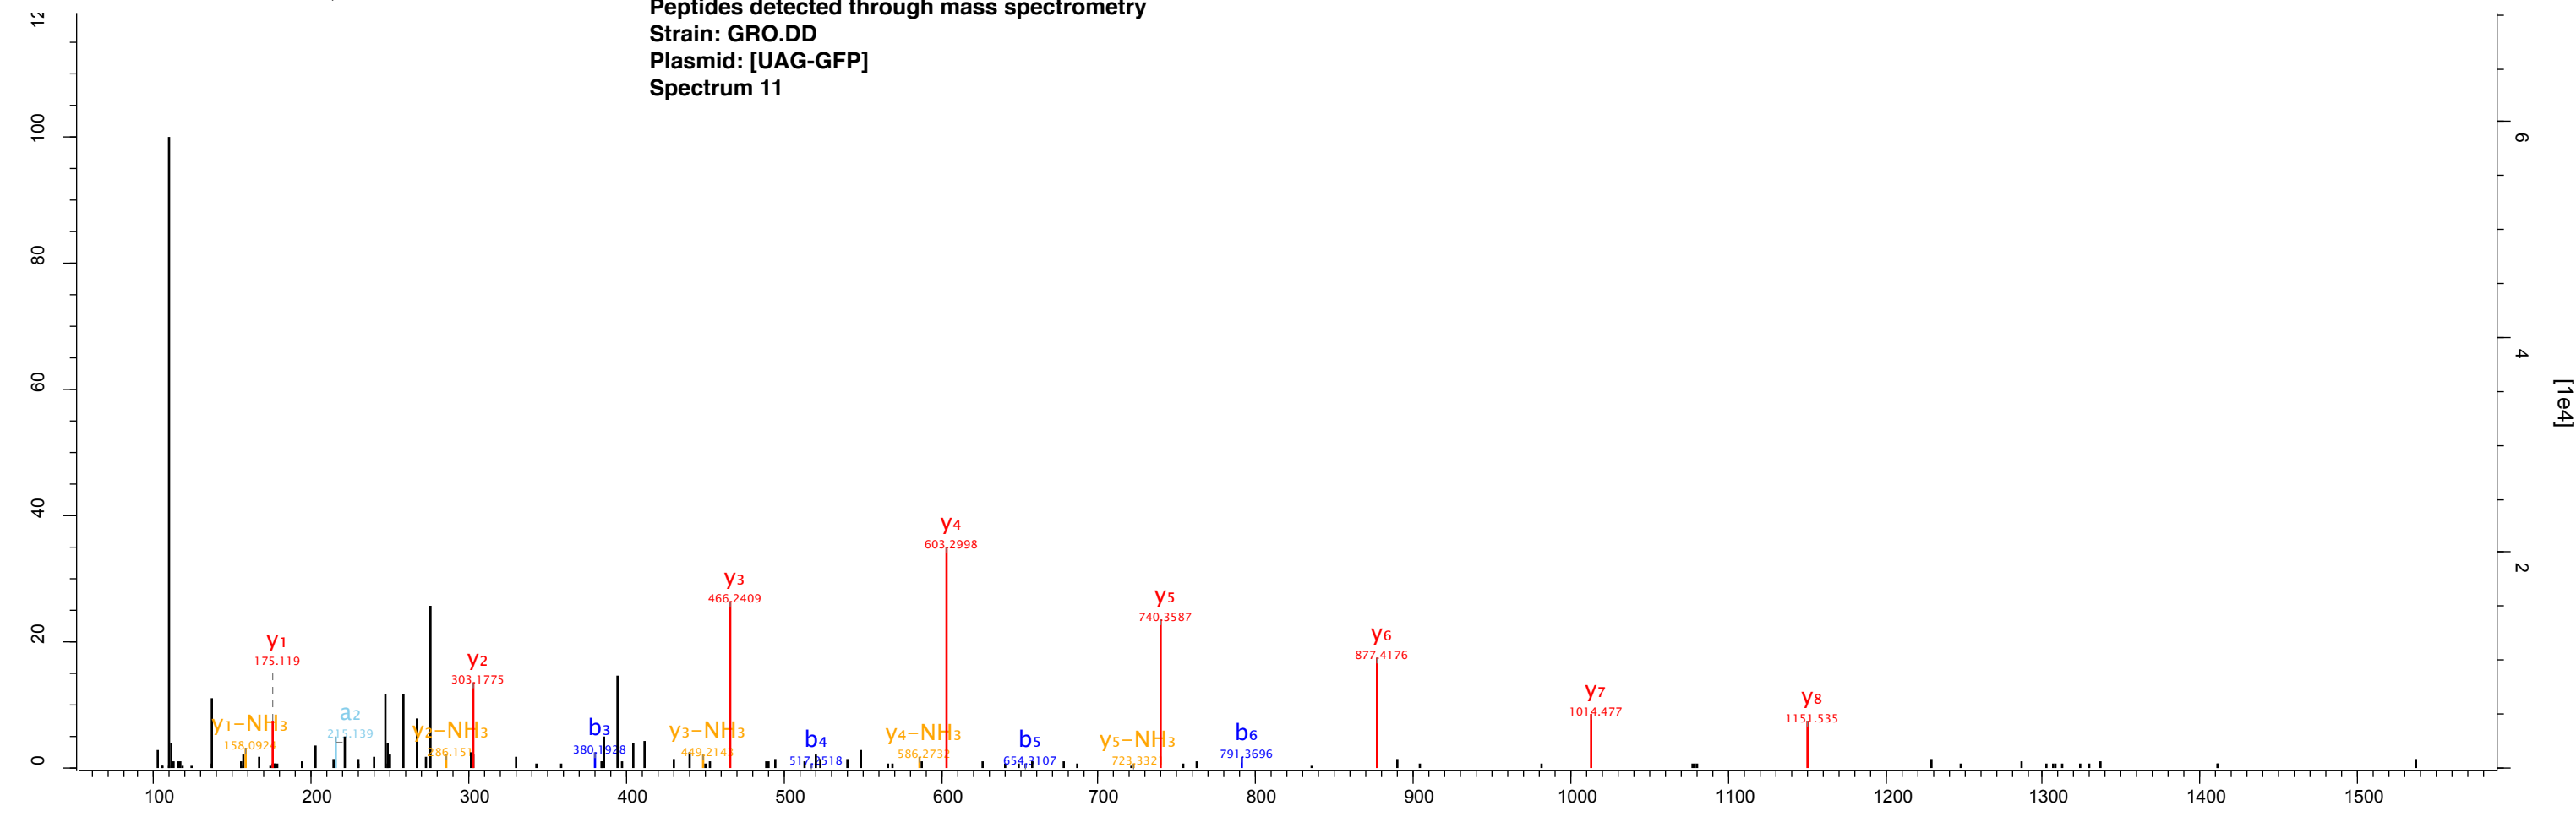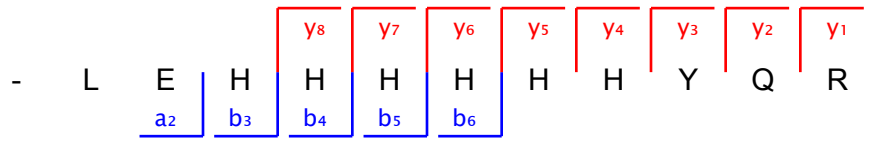

Raw file: VOT16-1571  
 Scan: 1299  
 Method: FTMS; HCD  
 Score: 67.21  
 m/z: 447.55

**Figure 2 – Supplement File 1**  
**Peptides detected through mass spectrometry**  
**Strain: GRO.DD**  
**Plasmid: [UAG-GFP]**  
**Spectrum 12**

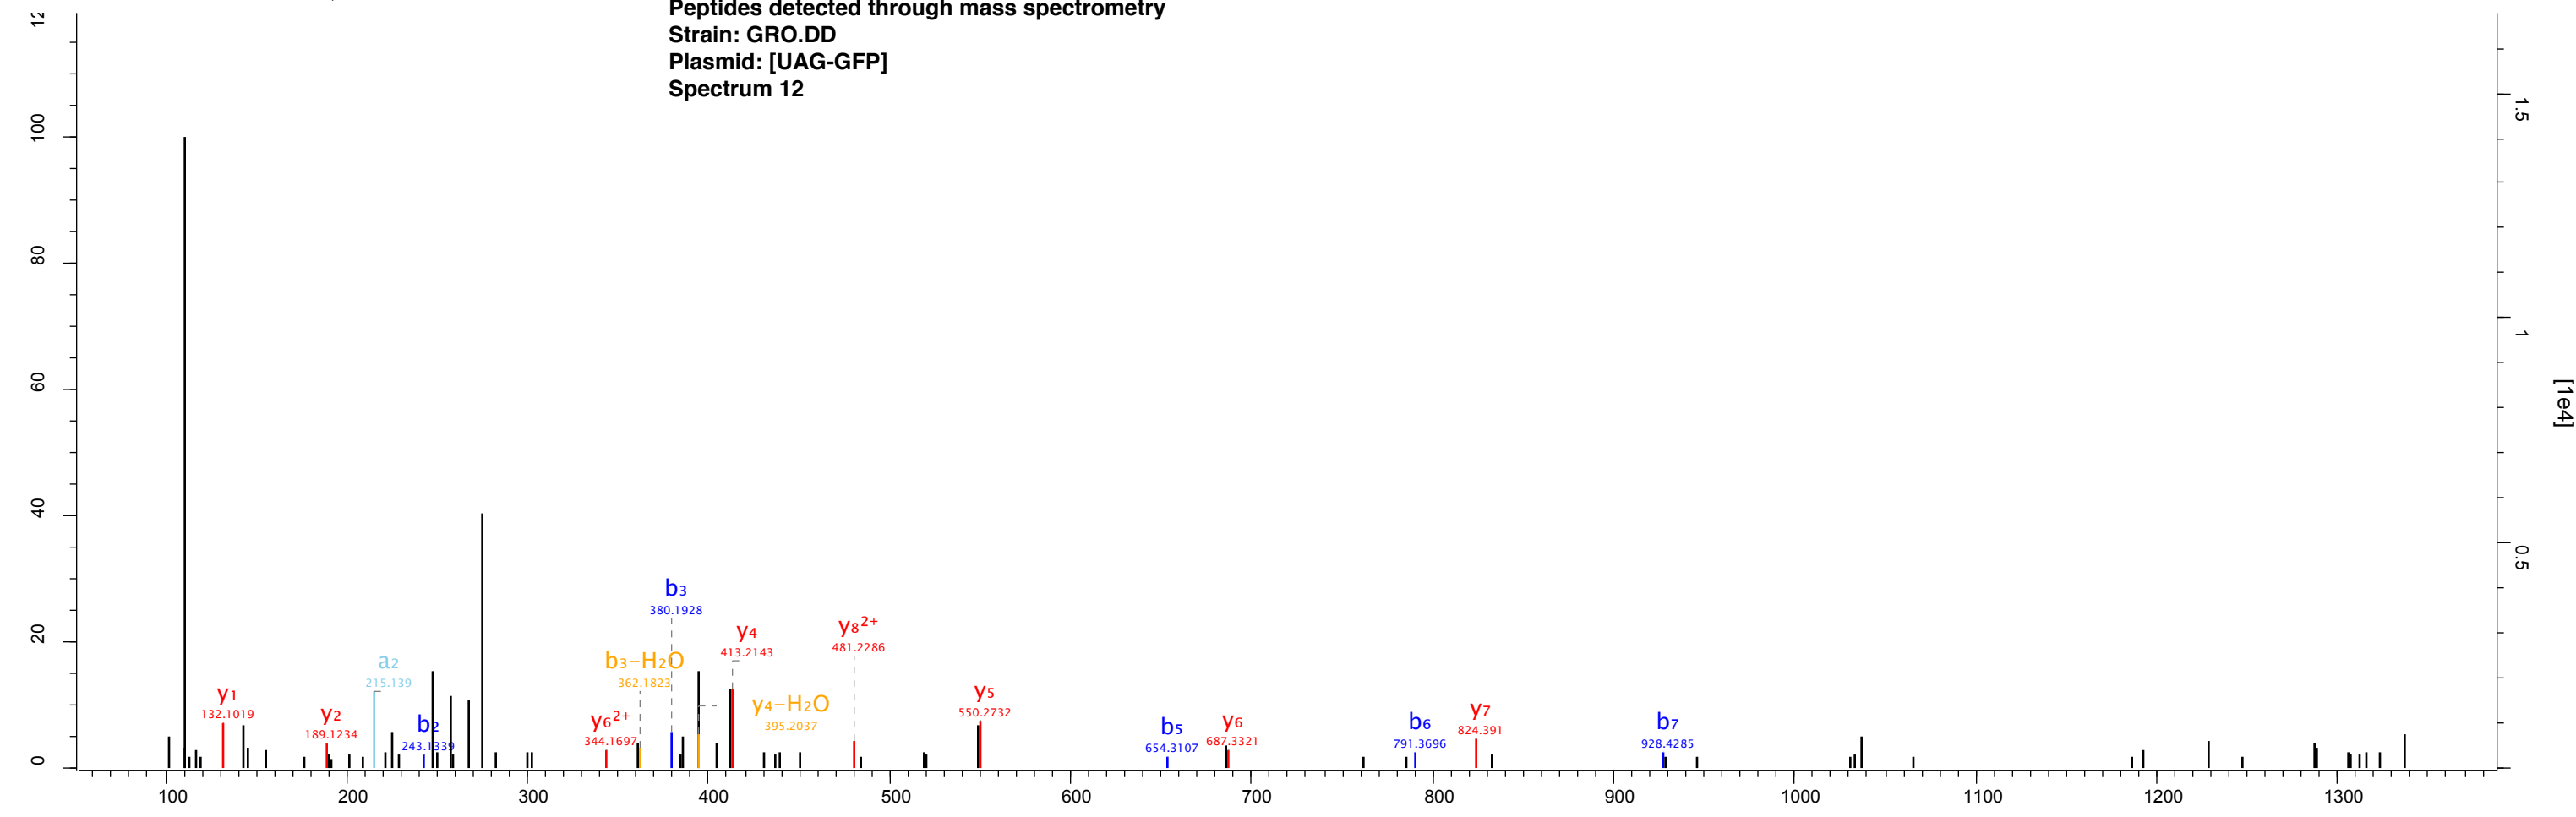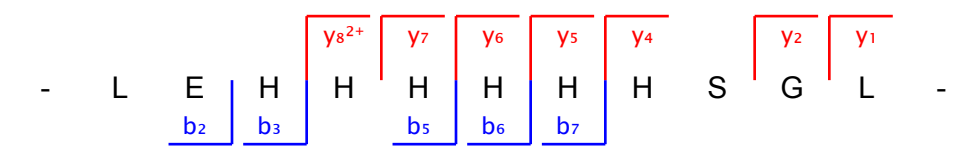

Raw file: VOT16-1571  
Scan: 1309  
Method: FTMS; HCD  
Score: 41.4  
m/z: 470.91

**Figure 2 – Supplement File 1**  
**Peptides detected through mass spectrometry**  
**Strain: GRO.DD**  
**Plasmid: [UAG-GFP]**  
**Spectrum 13**

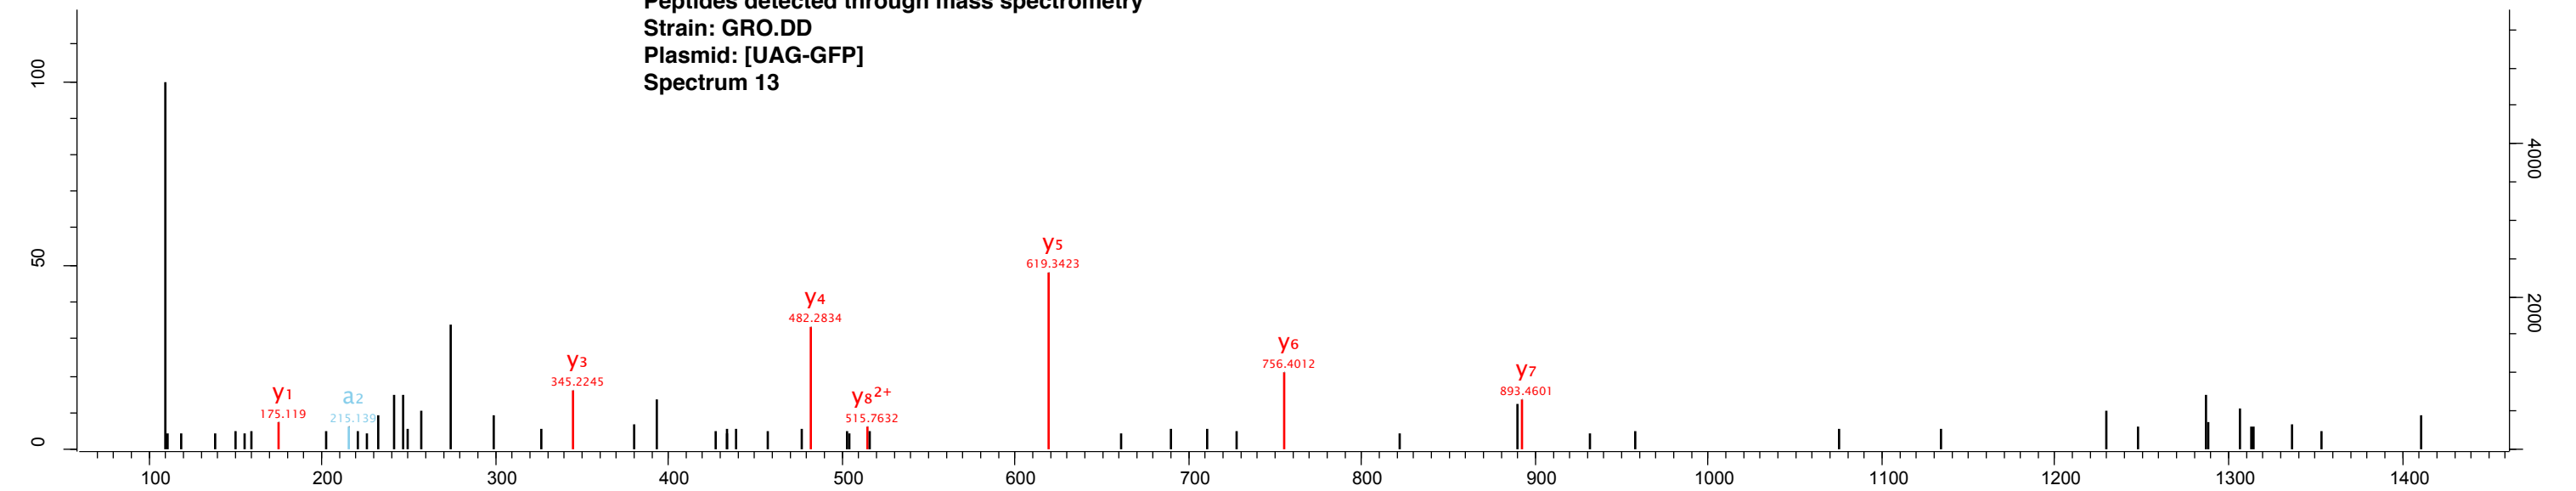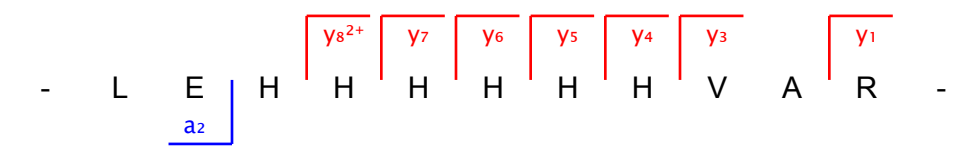

|            |      |           |       |        |
|------------|------|-----------|-------|--------|
| Raw file   | Scan | Method    | Score | m/z    |
| VOT16-1571 | 1309 | FTMS; HCD | 41.4  | 470.91 |

**Figure 2 – Supplement File 1**  
**Peptides detected through mass spectrometry**  
**Strain: GRO.DD**  
**Plasmid: [UAG-GFP]**  
**Spectrum 14**

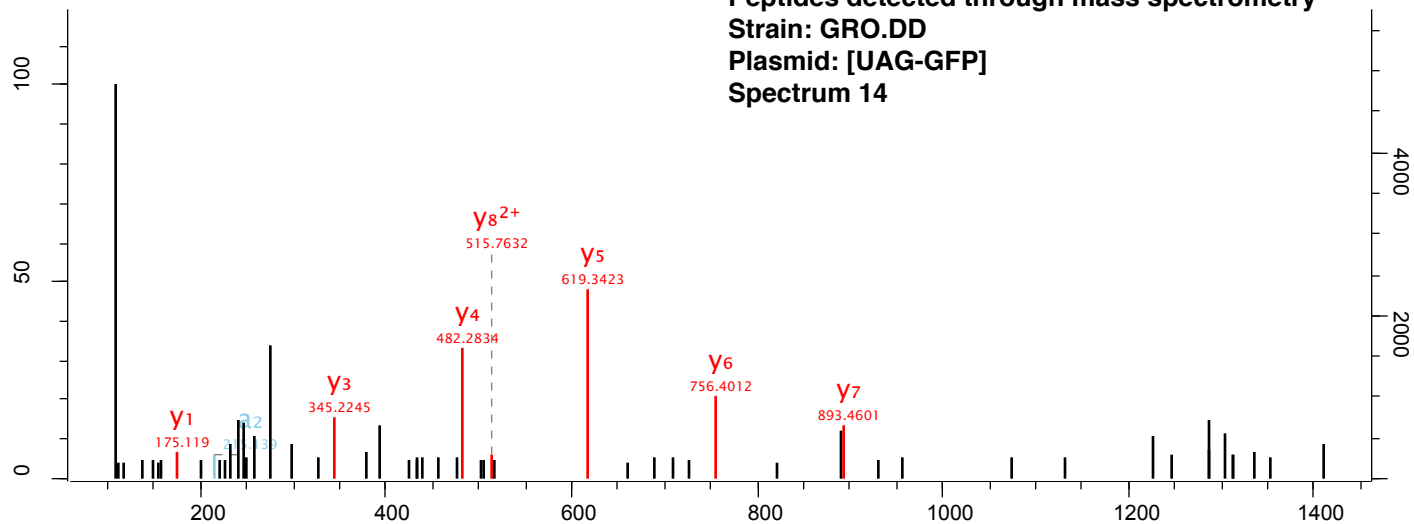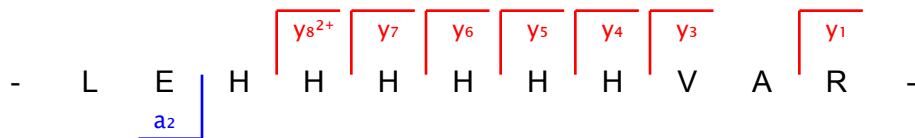

Raw file: VOT16-1571  
 Scan: 1389  
 Method: FTMS; HCD  
 Score: 40.88  
 m/z: 368.18

**Figure 2 – Supplement File 1**  
**Peptides detected through mass spectrometry**  
**Strain: GRO.DD**  
**Plasmid: [UAG-GFP]**  
**Spectrum 15**

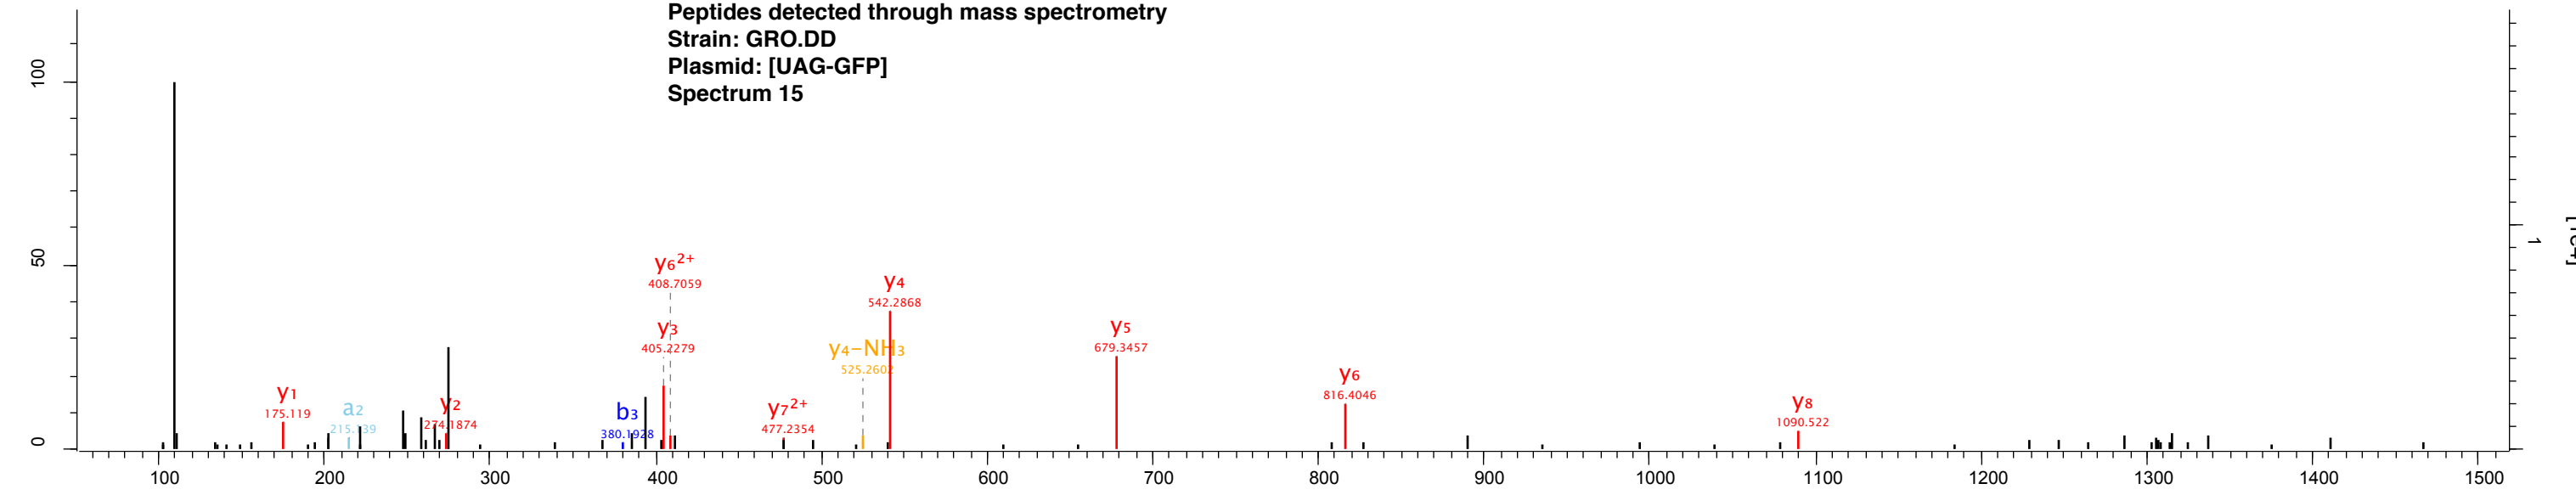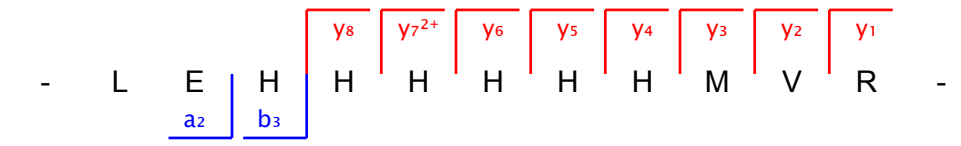

Raw file Scan Method Score m/z  
 VOT16-1571 1569 FTMS; HCD 90.76 435.46

**Figure 2 – Supplement File 1**  
**Peptides detected through mass spectrometry**  
**Strain: GRO.DD**  
**Plasmid: [UAG-GFP]**  
**Spectrum 16**

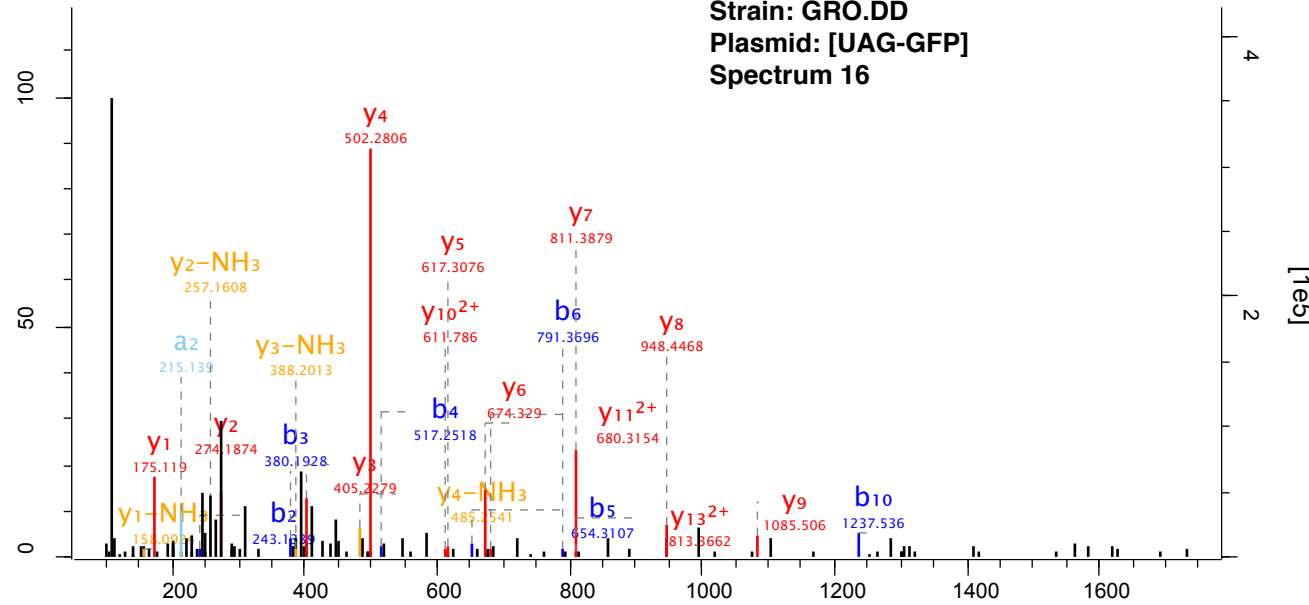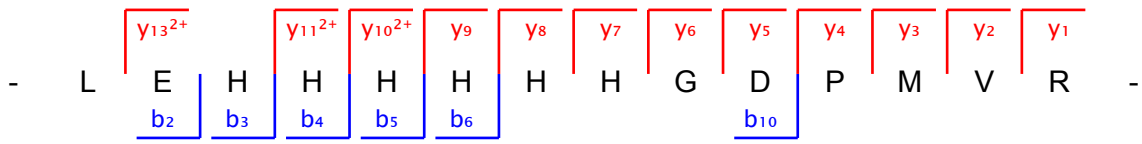



Raw file: VOT16-1571  
Scan: 1608  
Method: FTMS; HCD  
Score: 43.3  
m/z: 470.89

**Figure 2 – Supplement File 1**  
**Peptides detected through mass spectrometry**  
Strain: GRO.DD  
Plasmid: [UAG-GFP]  
Spectrum 17

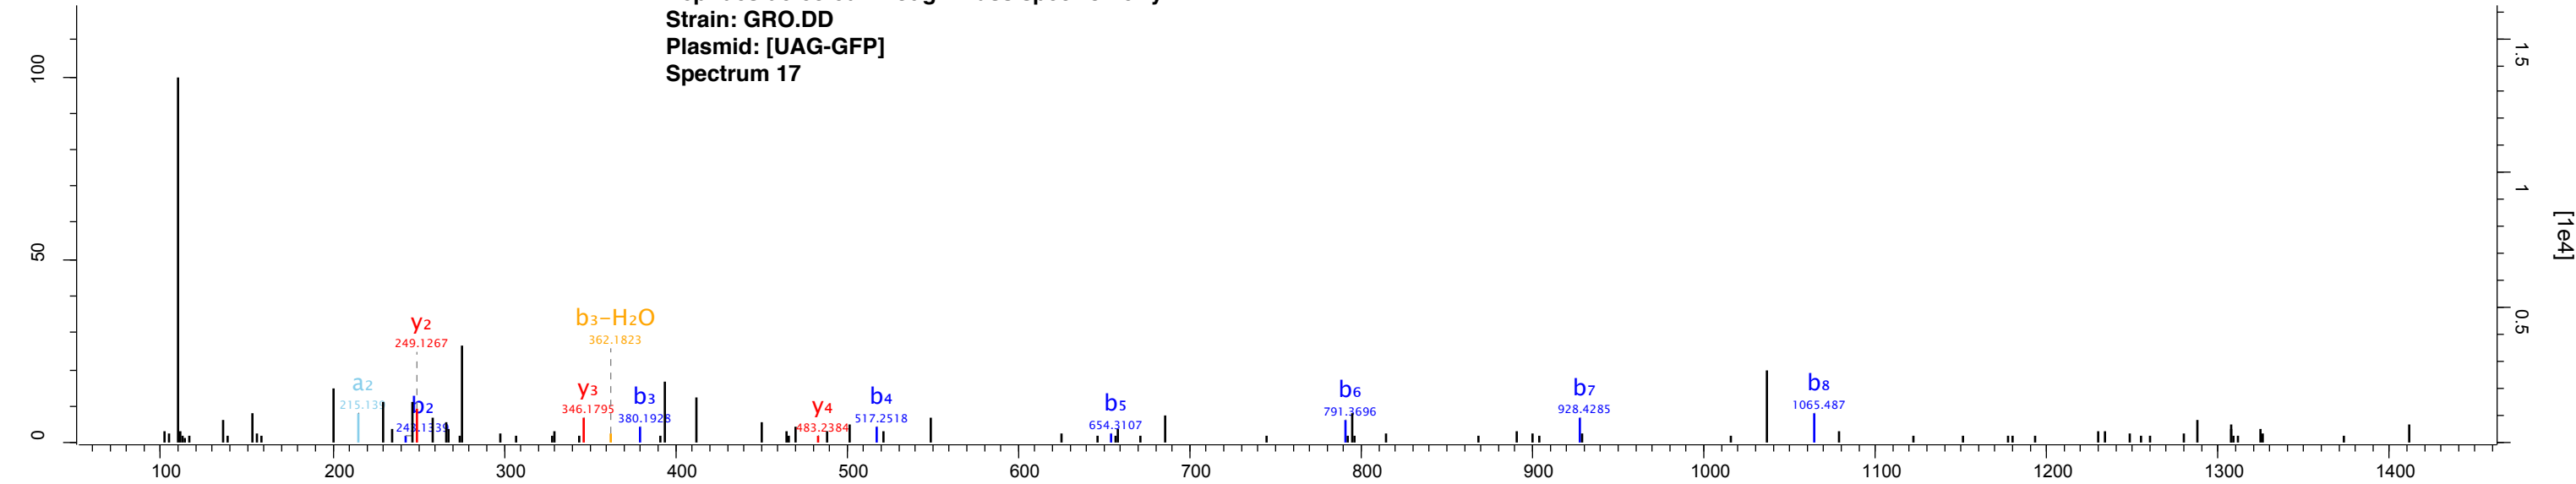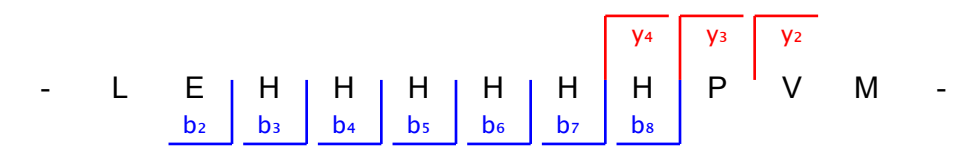

| Raw file   | Scan | Method    | Score | m/z    |
|------------|------|-----------|-------|--------|
| VOT16-1571 | 1608 | FTMS; HCD | 33.87 | 470.89 |

**Figure 2 – Supplement File 1**  
**Peptides detected through mass spectrometry**  
**Strain: GRO.DD**  
**Plasmid: [UAG-GFP]**  
**Spectrum 18**

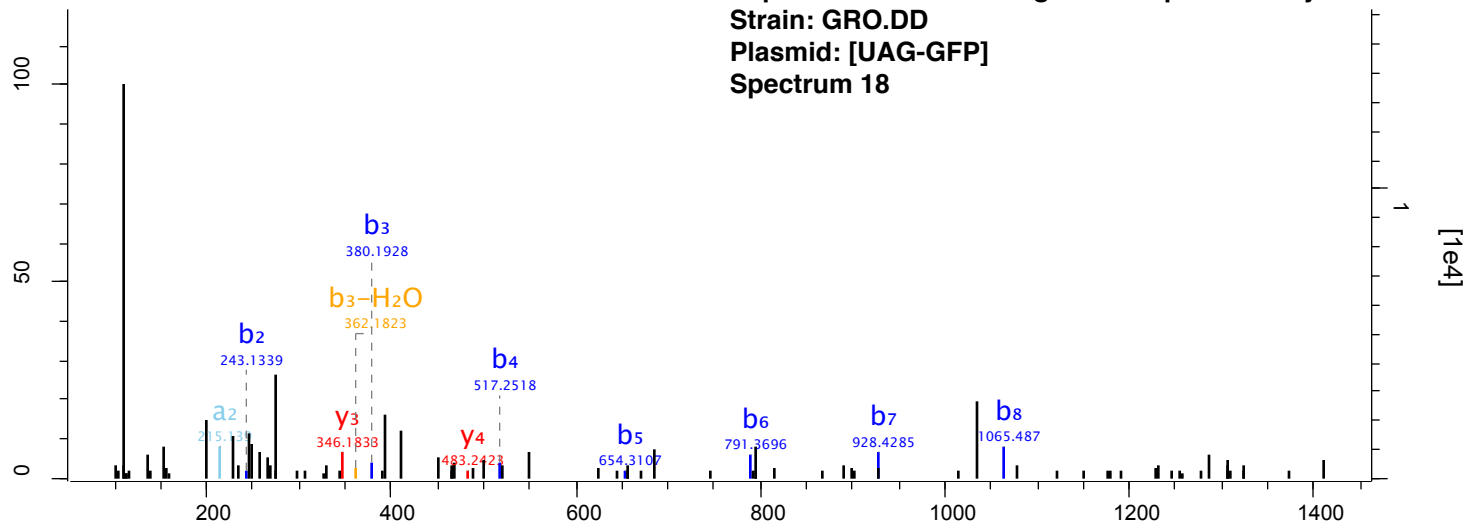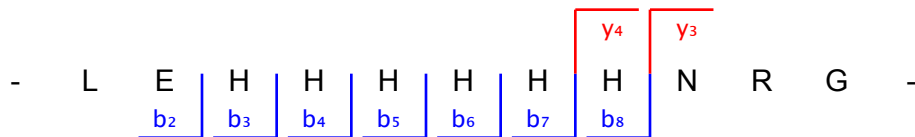

Raw file VOT16-1542 Scan 1710 Method FTMS; HCD Score 57.15 m/z 368.18

**Figure 2 – Supplement File 1**  
**Peptides detected through mass spectrometry**  
**Strain: GRO.DD**  
**Plasmid: [UAG-GFP]**  
**Spectrum 19**

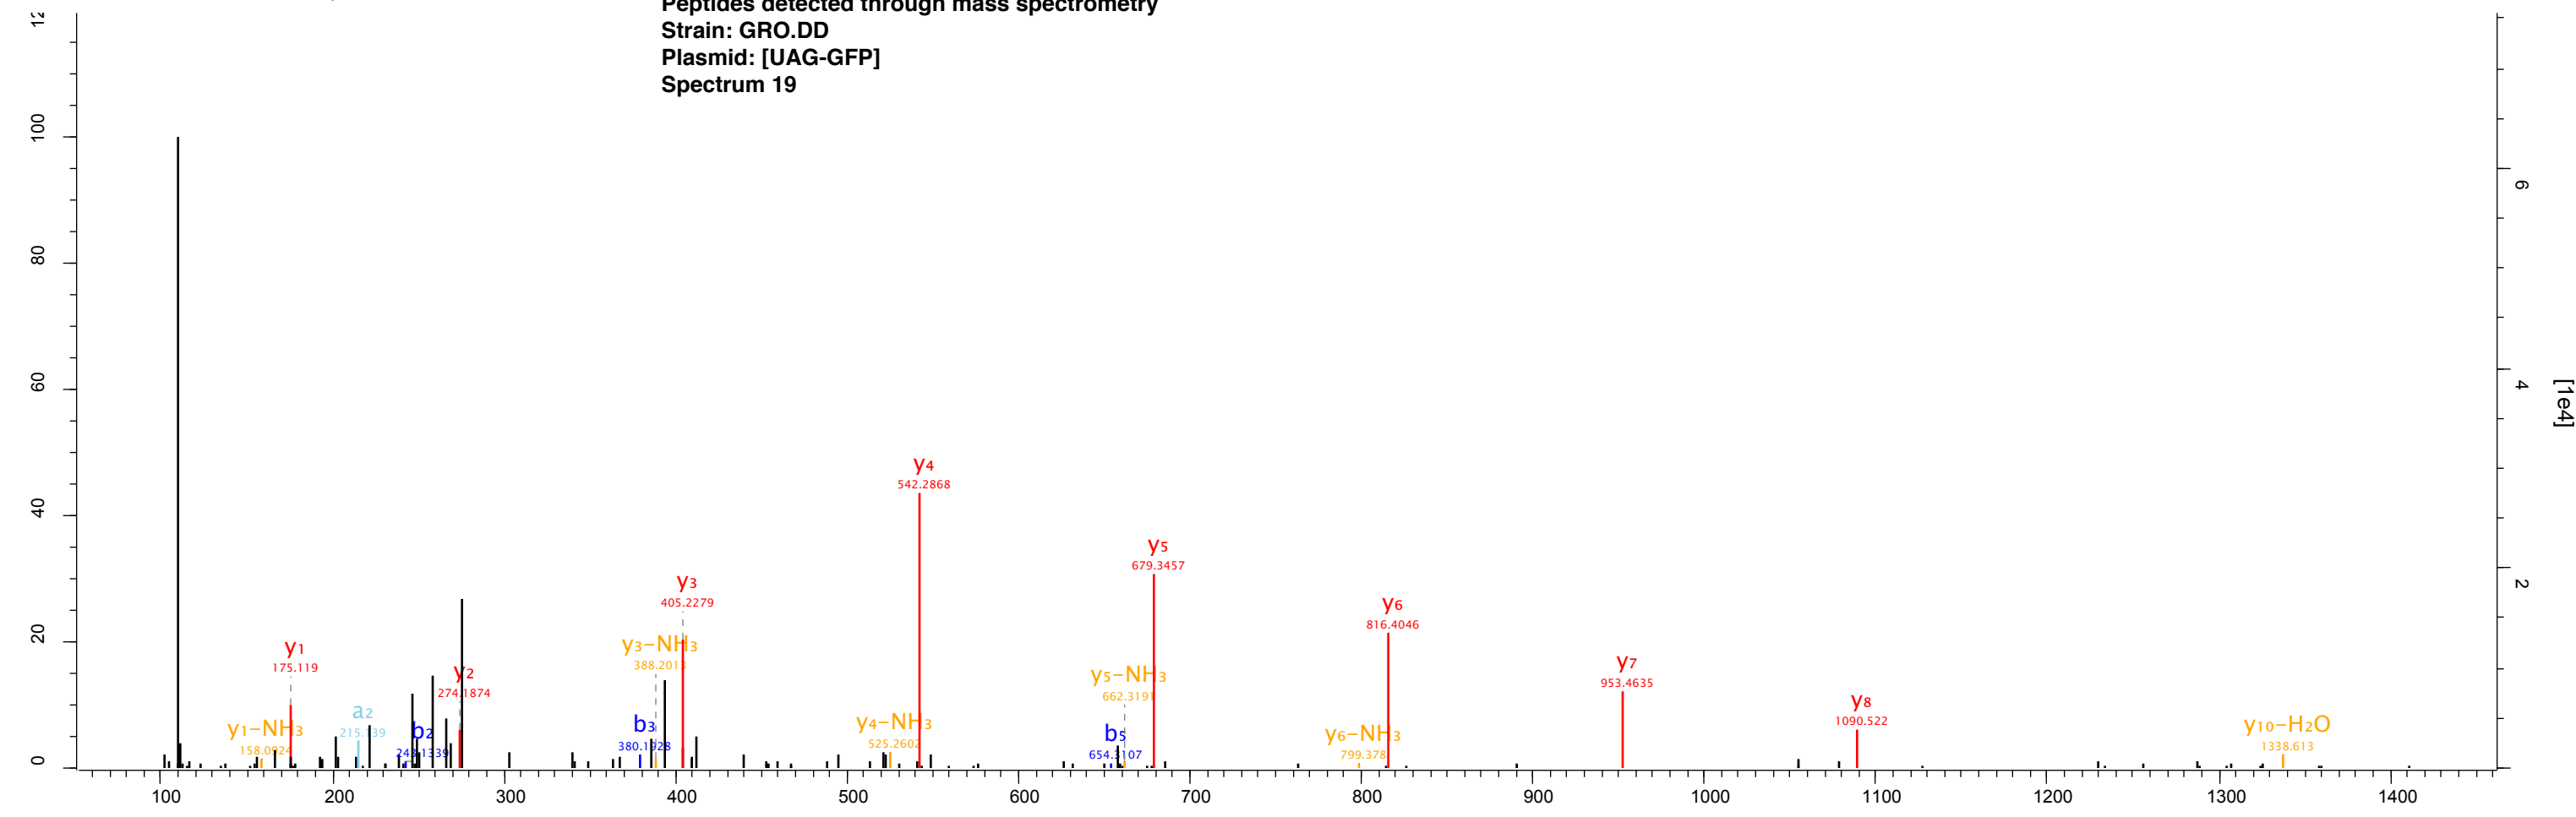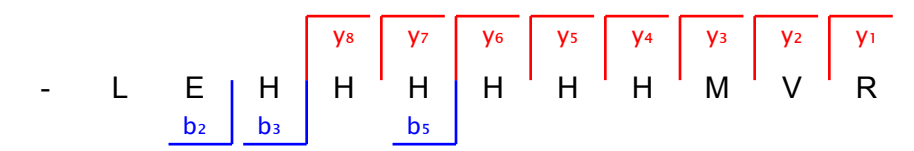

Raw file VOT16-1542 Scan 1711 Method FTMS; HCD Score 47.3 m/z 490.57

Figure 2 – Supplement File 1  
Peptides detected through mass spectrometry  
Strain: GRO.DD  
Plasmid: [UAG-GFP]  
Spectrum 20

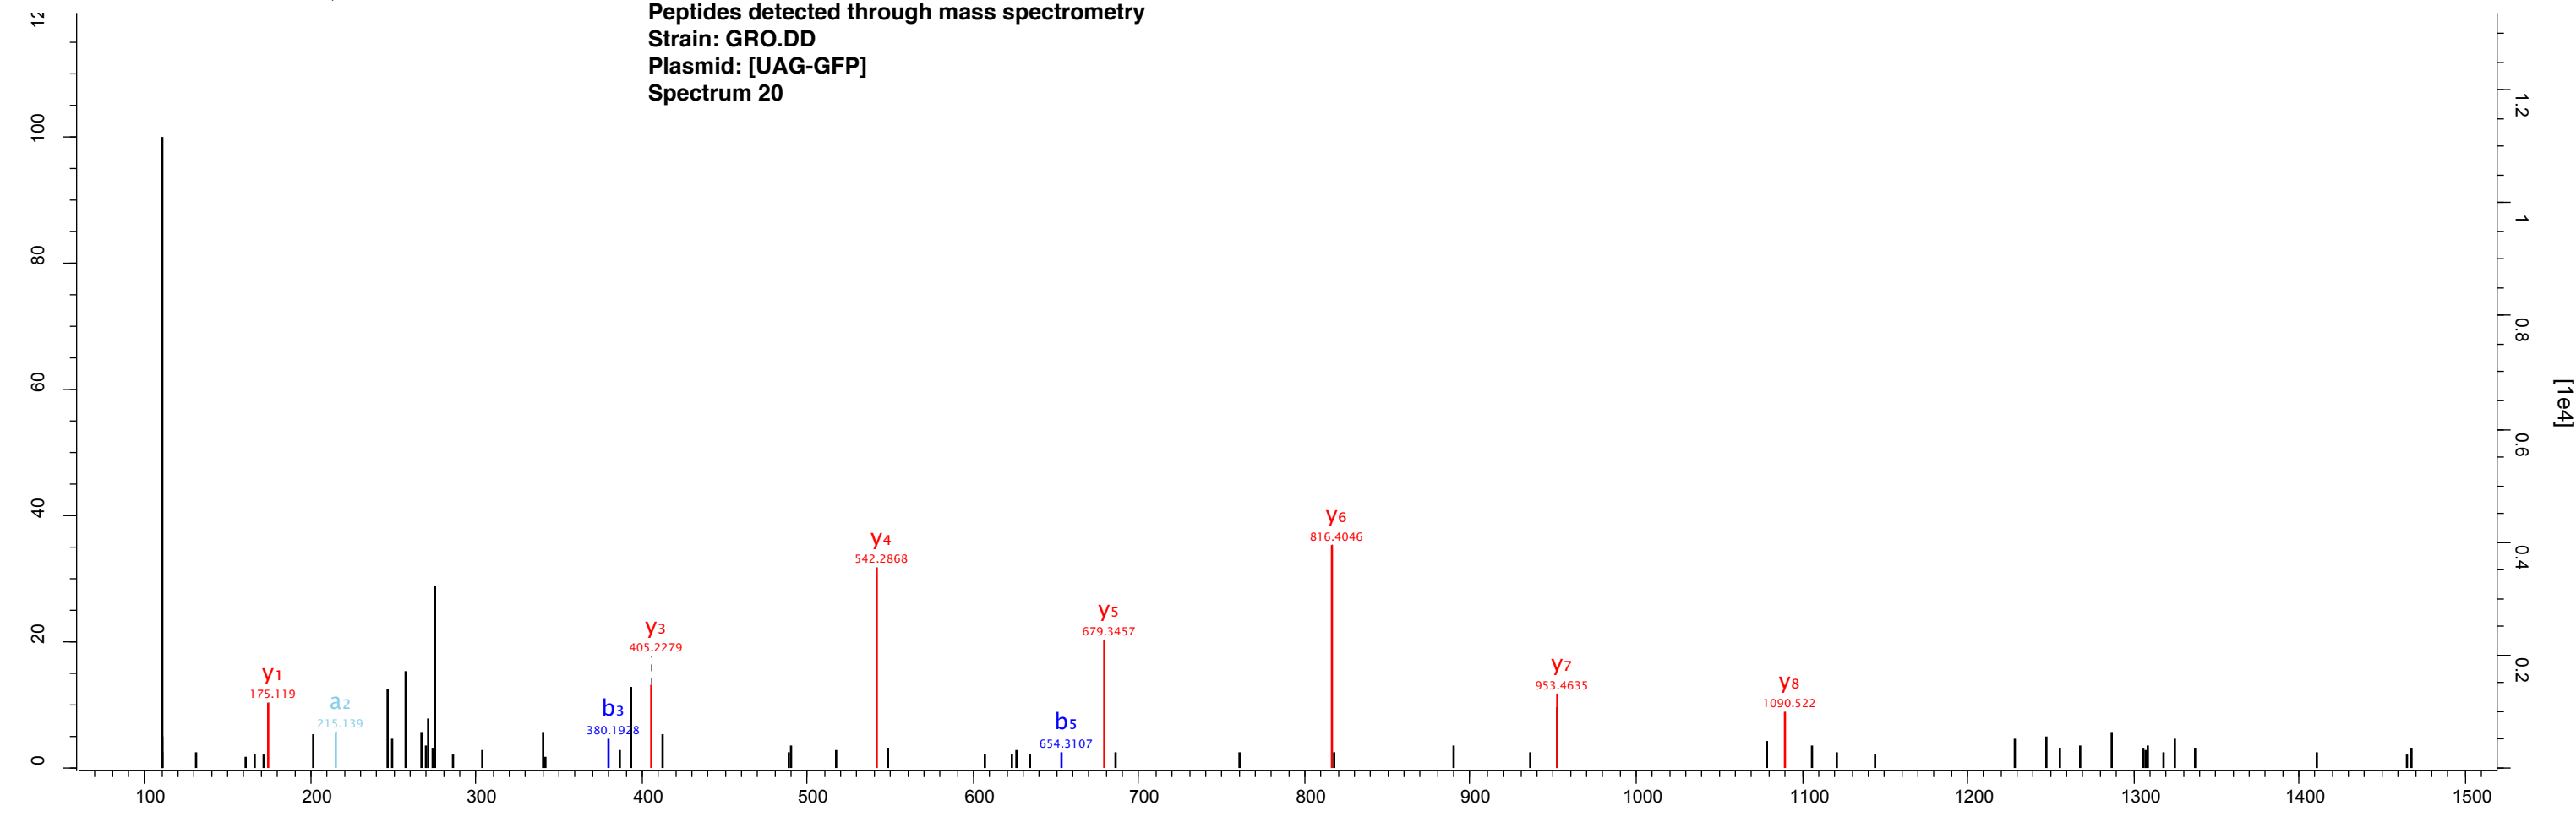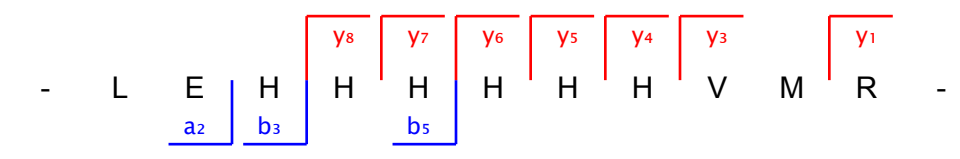

Raw file Scan Method Score m/z  
VOT16-1542 1726 FTMS; HCD 14.01 485.24

**Figure 2 – Supplement File 1**  
**Peptides detected through mass spectrometry**  
**Strain: GRO.DD**  
**Plasmid: [UAG-GFP]**  
**Spectrum 21**

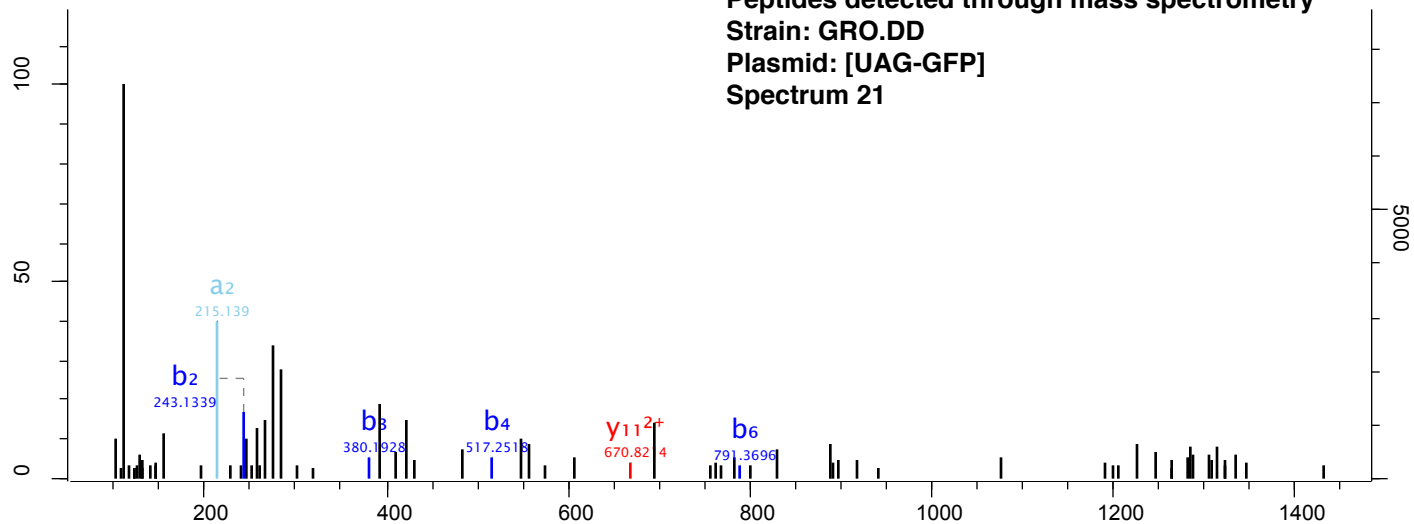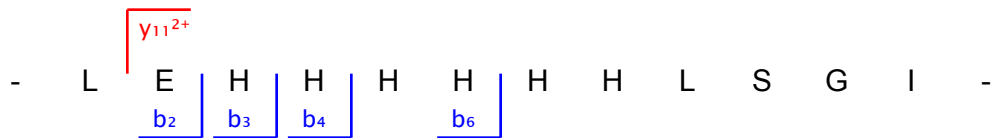

Raw file VOT16-1542 Scan 1751 Method FTMS; HCD Score 56.4 m/z 360.67

**Figure 2 – Supplement File 1**  
**Peptides detected through mass spectrometry**  
**Strain: GRO.DD**  
**Plasmid: [UAG-GFP]**  
**Spectrum 22**

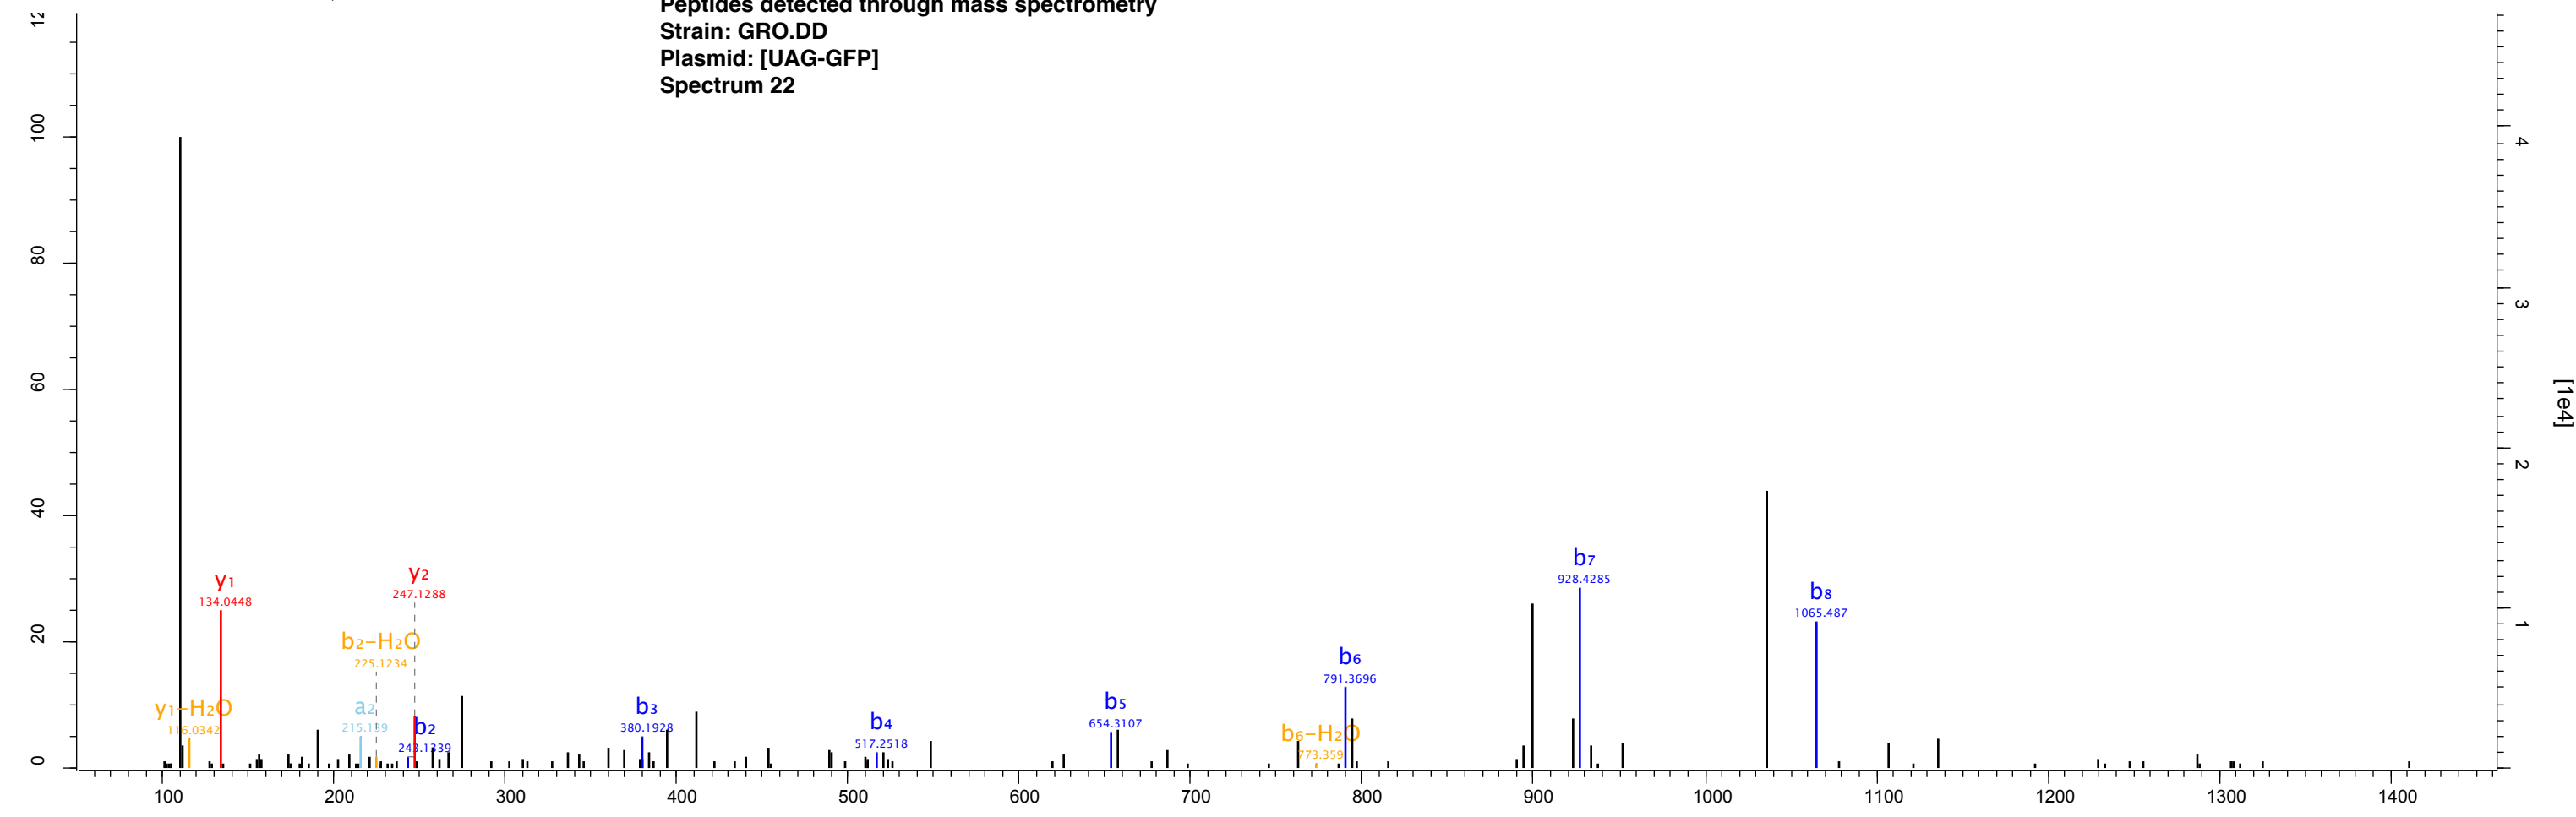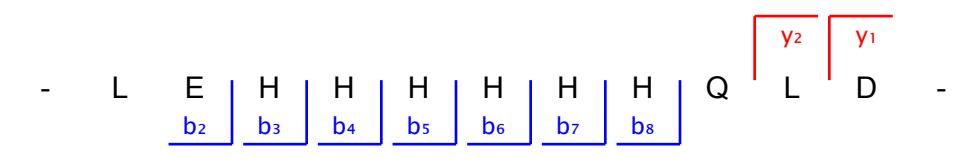

Raw file VOT16-1542 Scan 1766 Method FTMS; HCD Score 46.41 m/z 383.44

**Figure 2 – Supplement File 1**  
**Peptides detected through mass spectrometry**  
**Strain: GRO.DD**  
**Plasmid: [UAG-GFP]**  
**Spectrum 23**

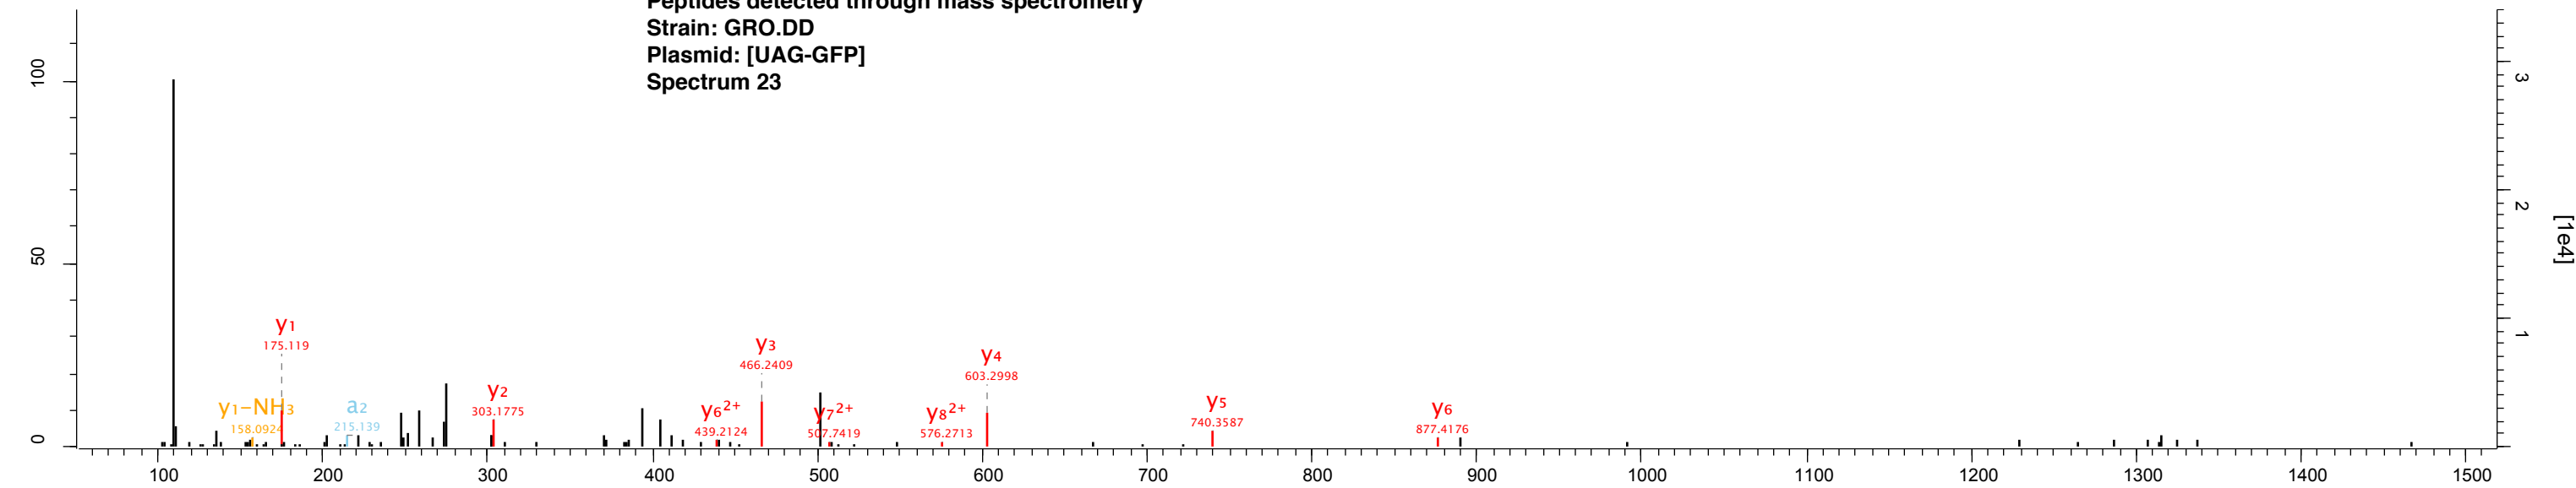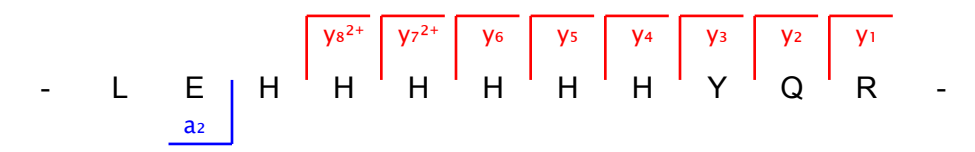

Raw file Scan Method Score m/z  
 VOT16-1571 1770 FTMS; HCD 72.36 638.53

**Figure 2 – Supplement File 1**  
**Peptides detected through mass spectrometry**  
**Strain: GRO.DD**  
**Plasmid: [UAG-GFP]**  
**Spectrum 24**

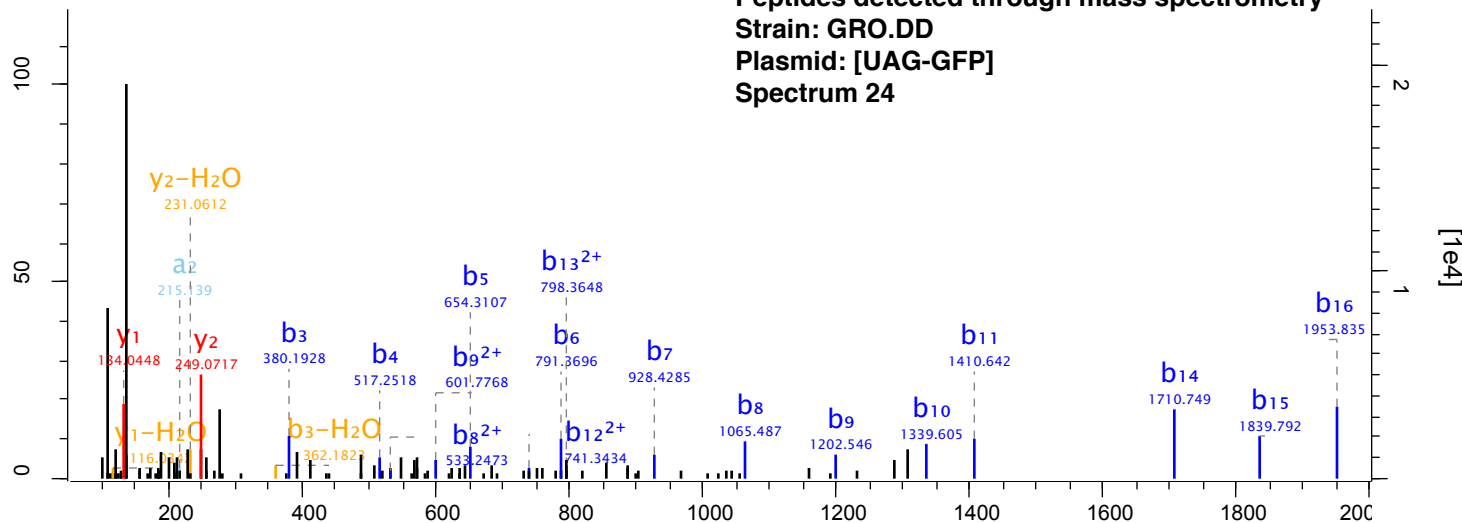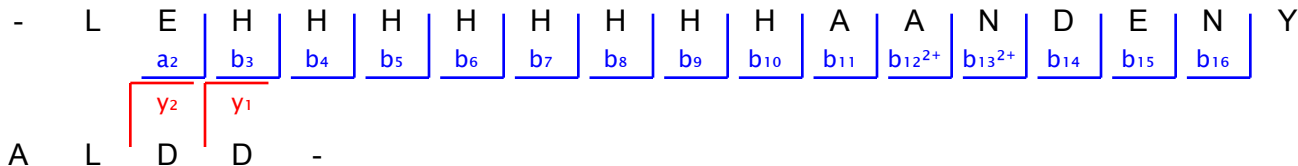



| Raw file   | Scan | Method    | Score | m/z   |
|------------|------|-----------|-------|-------|
| VOT16-1571 | 1777 | FTMS; HCD | 97.77 | 618.3 |

**Figure 2 – Supplement File 1**  
**Peptides detected through mass spectrometry**  
**Strain: GRO.DD**  
**Plasmid: [UAG-GFP]**  
**Spectrum 25**

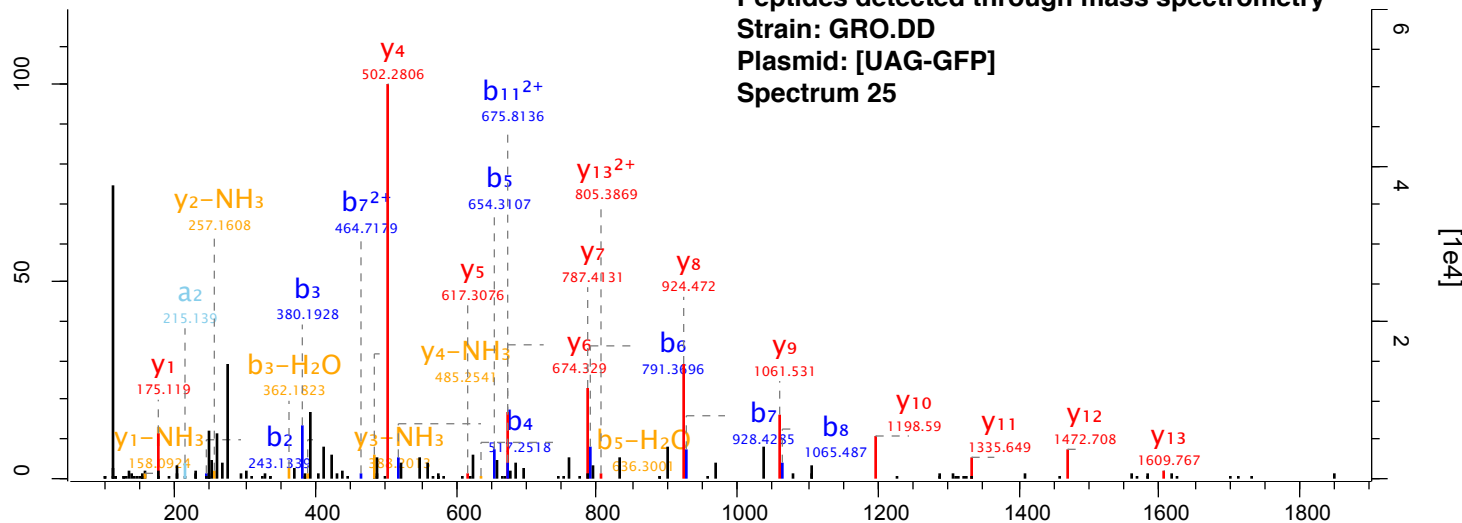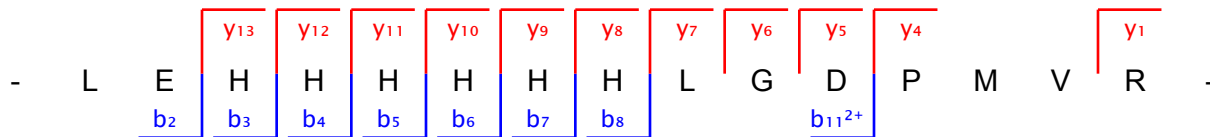

Raw file Scan Method Score m/z  
 VOT16-1542 1785 FTMS; HCD 159.12 580.28

**Figure 2 – Supplement File 1**  
**Peptides detected through mass spectrometry**  
**Strain: GRO.DD**  
**Plasmid: [UAG-GFP]**  
**Spectrum 26**

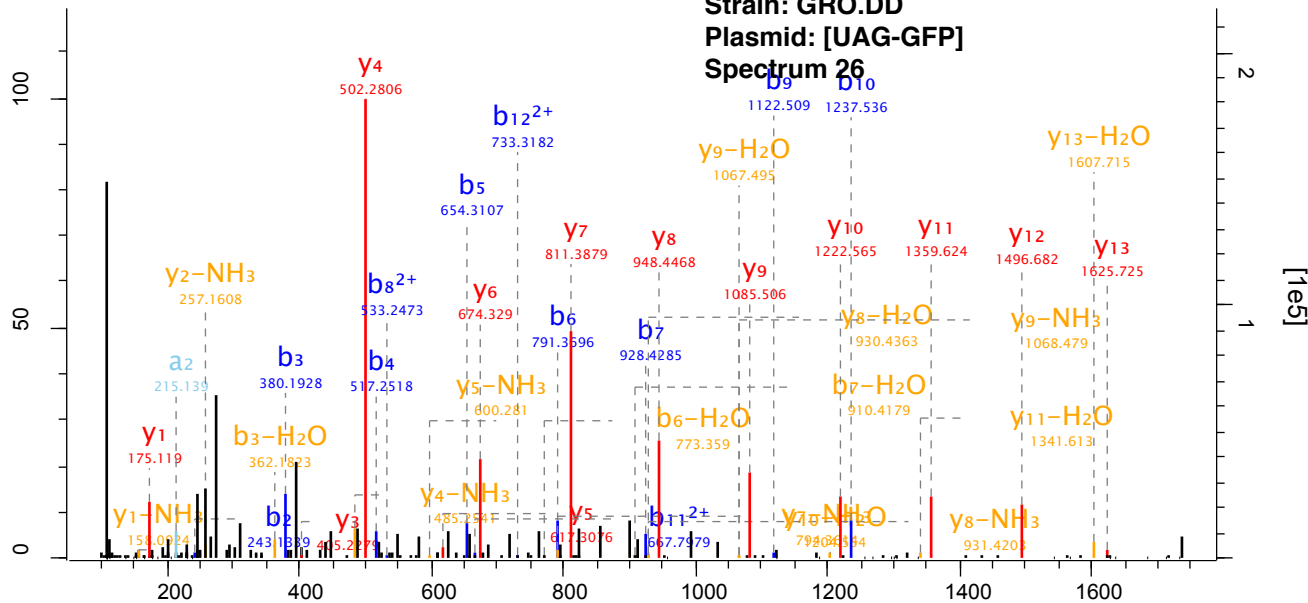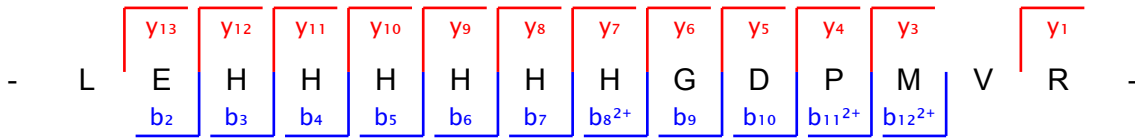

Raw file Scan Method Score m/z  
 VOT16-1542 1785 FTMS; HCD 159.12 580.28

**Figure 2 – Supplement File 1**  
**Peptides detected through mass spectrometry**  
**Strain: GRO.DD**  
**Plasmid: [UAG-GFP]**  
**Spectrum 27**

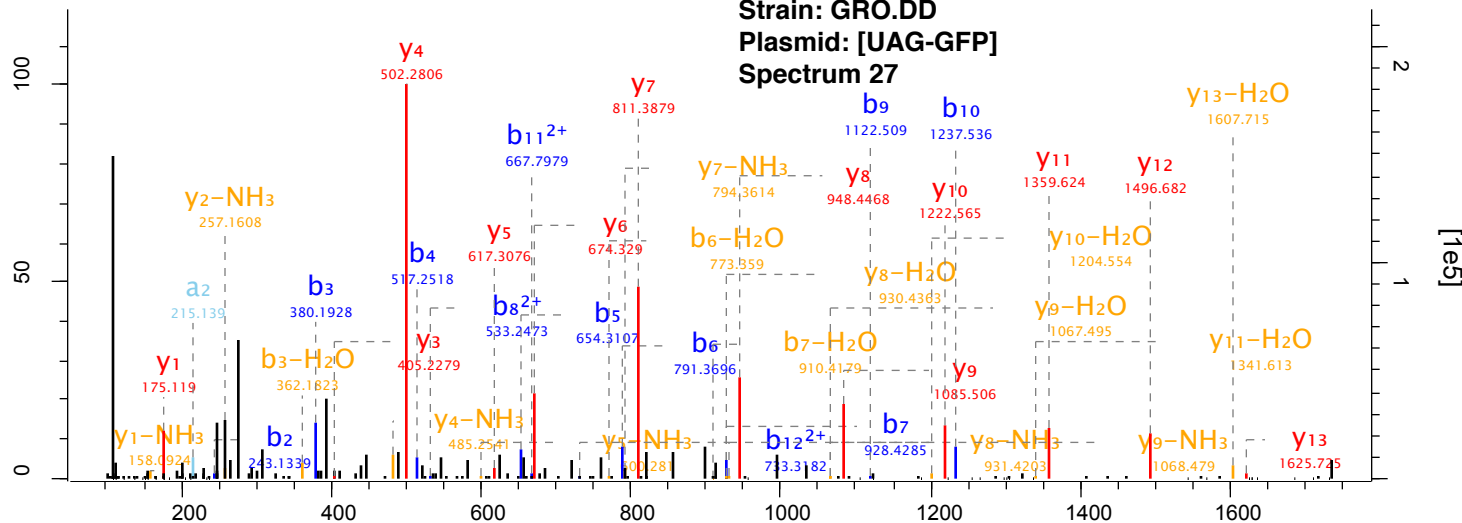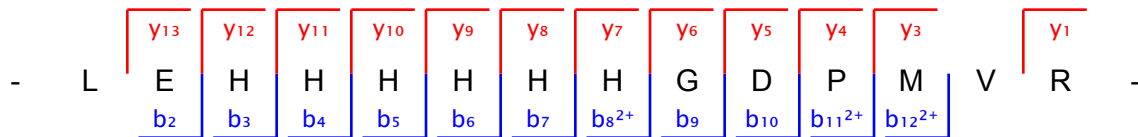

Raw file Scan Method Score m/z  
 VOT16-1571 1786 FTMS; HCD 99.04 805.01

**Figure 2 – Supplement File 1**  
**Peptides detected through mass spectrometry**  
**Strain: GRO.DD**  
**Plasmid: [UAG-GFP]**  
**Spectrum 28**

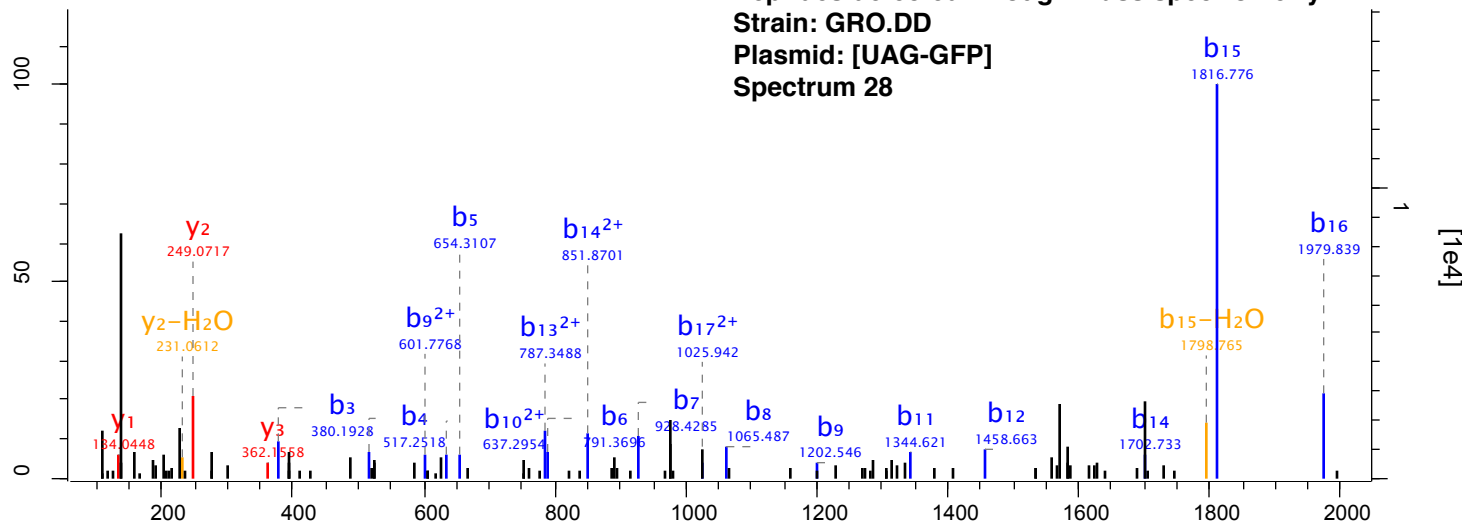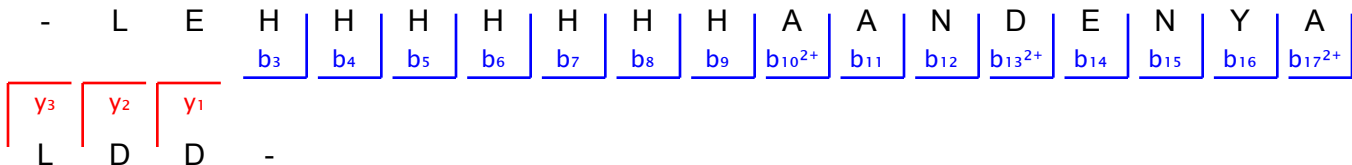

| Raw file   | Scan | Method    | Score | m/z    |
|------------|------|-----------|-------|--------|
| VOT16-1571 | 1832 | FTMS; HCD | 31.41 | 582.97 |

**Figure 2 – Supplement File 1**  
**Peptides detected through mass spectrometry**  
**Strain: GRO.DD**  
**Plasmid: [UAG-GFP]**  
**Spectrum 29**

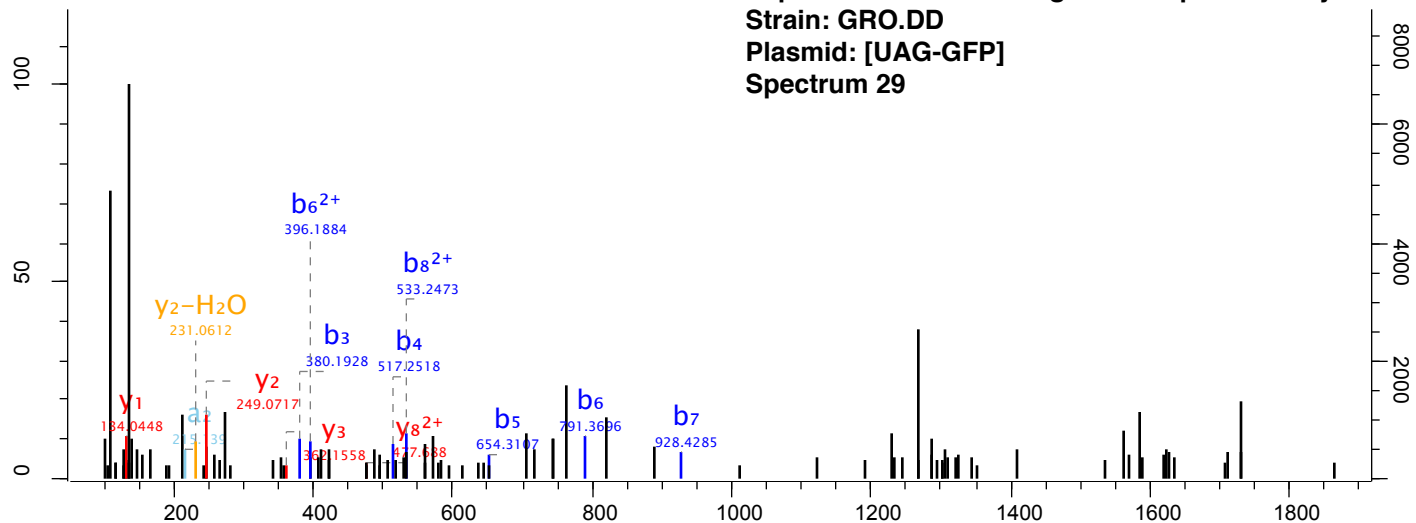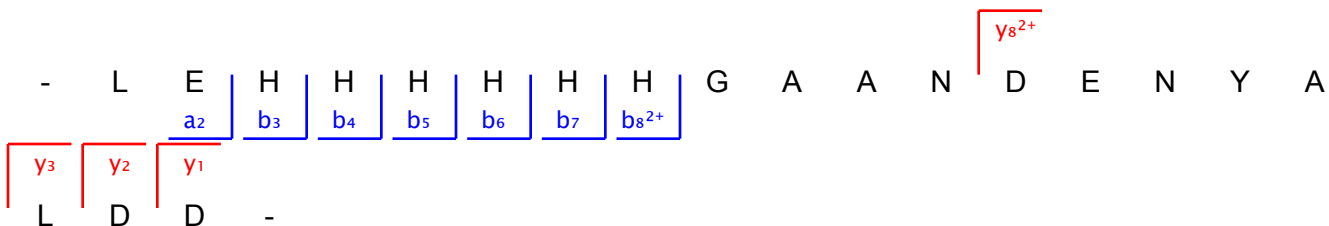

Raw file Scan Method Score m/z  
 VOT16-1571 1843 FTMS; HCD 146.78 1138.48

**Figure 2 – Supplement File 1**  
**Peptides detected through mass spectrometry**  
**Strain: GRO.DD**  
**Plasmid: [UAG-GFP]**  
**Spectrum 30**

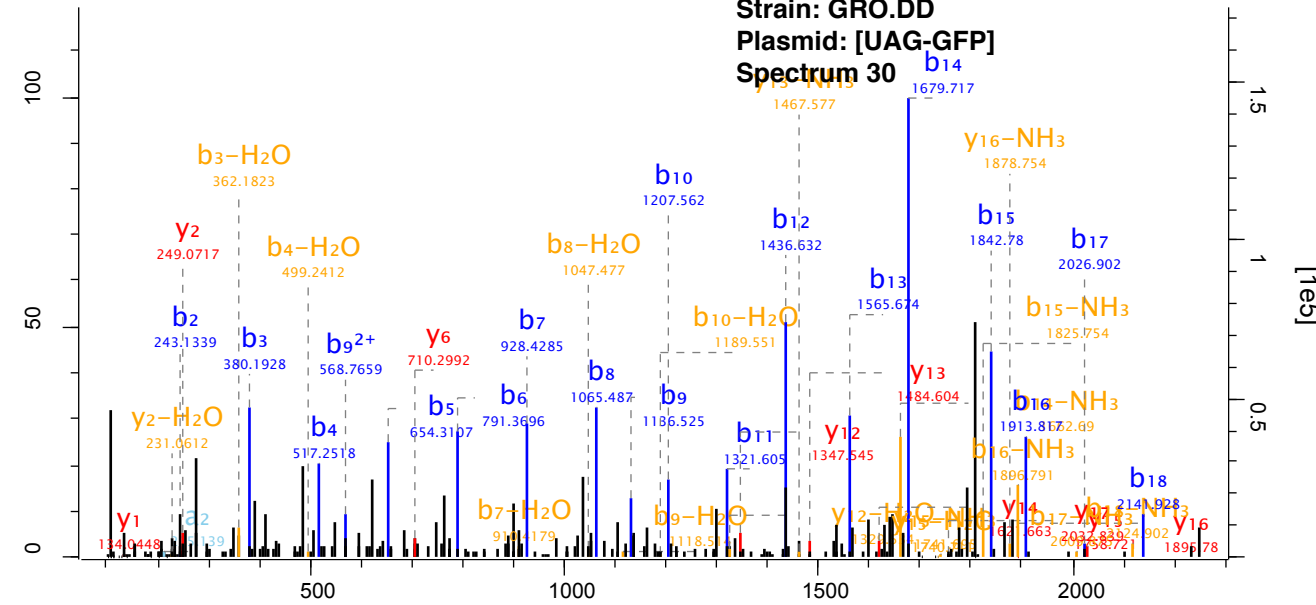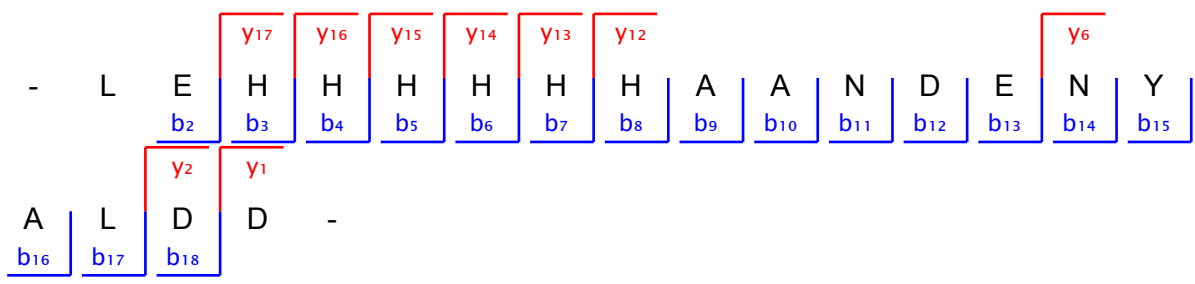



Raw file VOT16-1542 Scan 1846 Method FTMS; HCD Score 15.94 m/z 503.58

**Figure 2 – Supplement File 1**  
**Peptides detected through mass spectrometry**  
**Strain: GRO.DD**  
**Plasmid: [UAG-GFP]**  
**Spectrum 32**

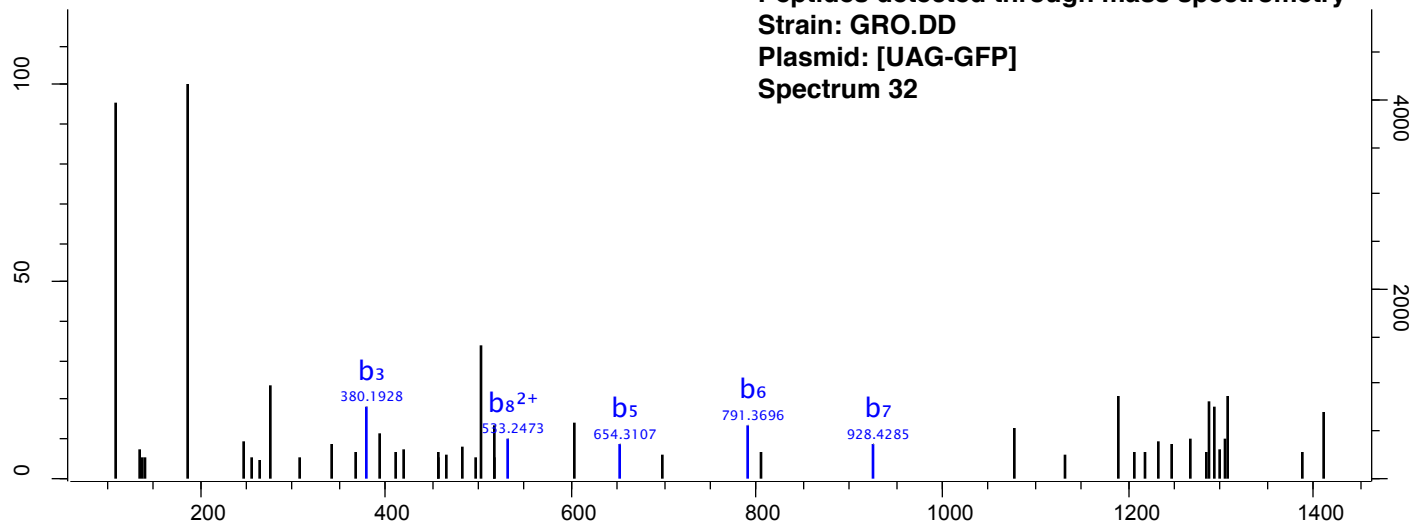

- L E H H H H H A S G I P -

          b<sub>3</sub>          b<sub>5</sub>  b<sub>6</sub>  b<sub>7</sub>  b<sub>8</sub><sup>2+</sup>



Raw file VOT16-1542 Scan 1856 Method FTMS; HCD Score 41.08 m/z 479.9

**Figure 2 – Supplement File 1**  
**Peptides detected through mass spectrometry**  
**Strain: GRO.DD**  
**Plasmid: [UAG-GFP]**  
**Spectrum 33**

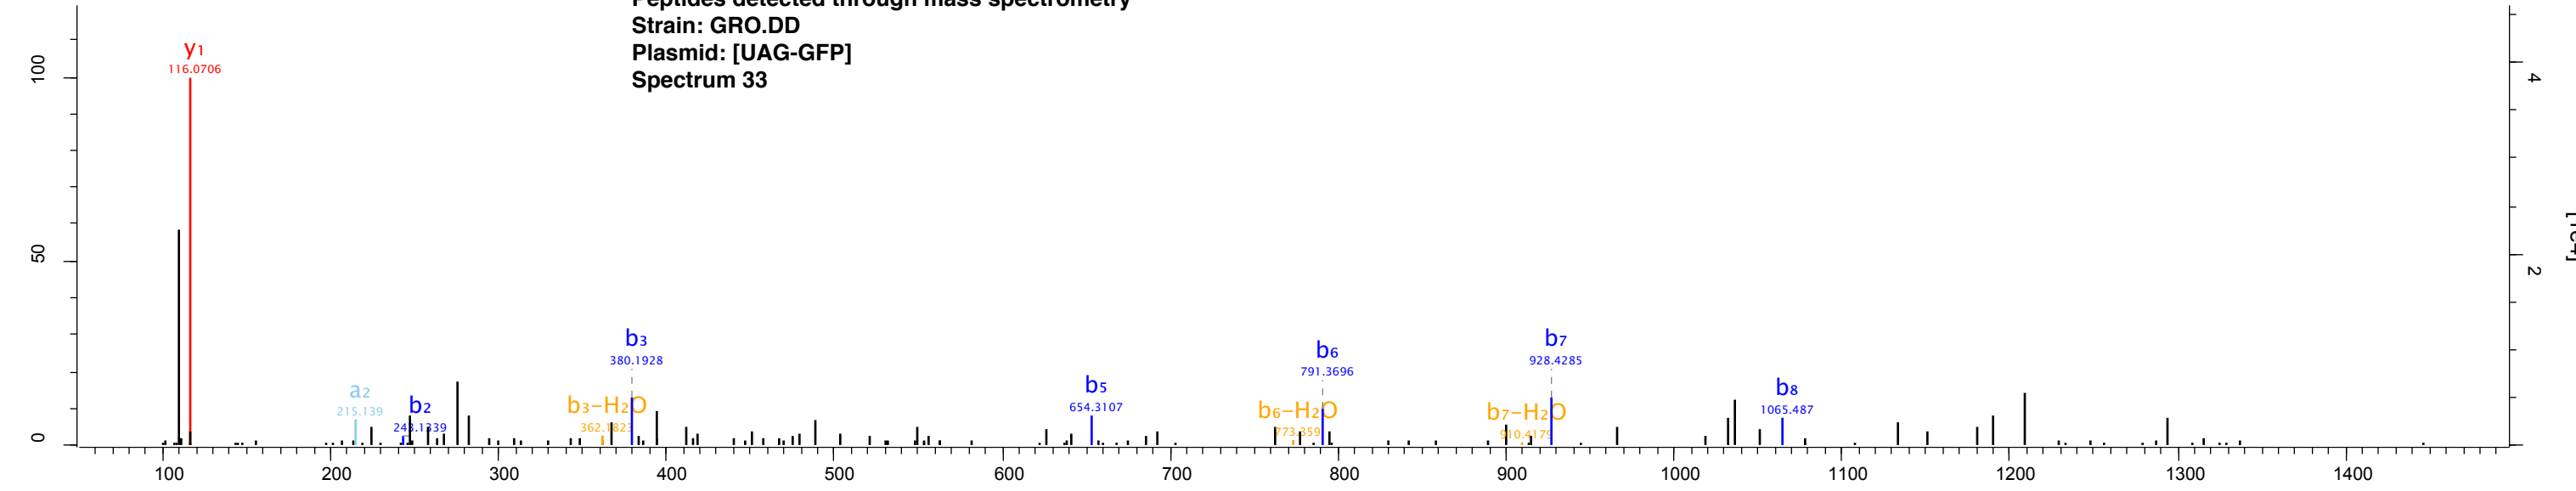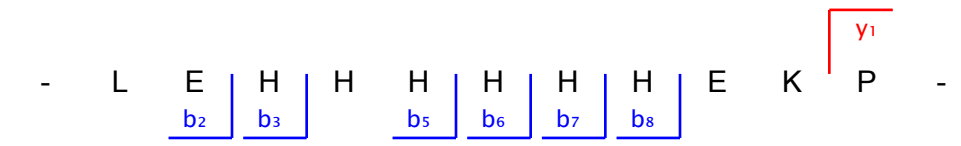

| Raw file   | Scan | Method    | Score | m/z   |
|------------|------|-----------|-------|-------|
| VOT16-1571 | 1857 | FTMS; HCD | 79.84 | 513.5 |

**Figure 2 – Supplement File 1**  
**Peptides detected through mass spectrometry**  
**Strain: GRO.DD**  
**Plasmid: [UAG-GFP]**  
**Spectrum 34**

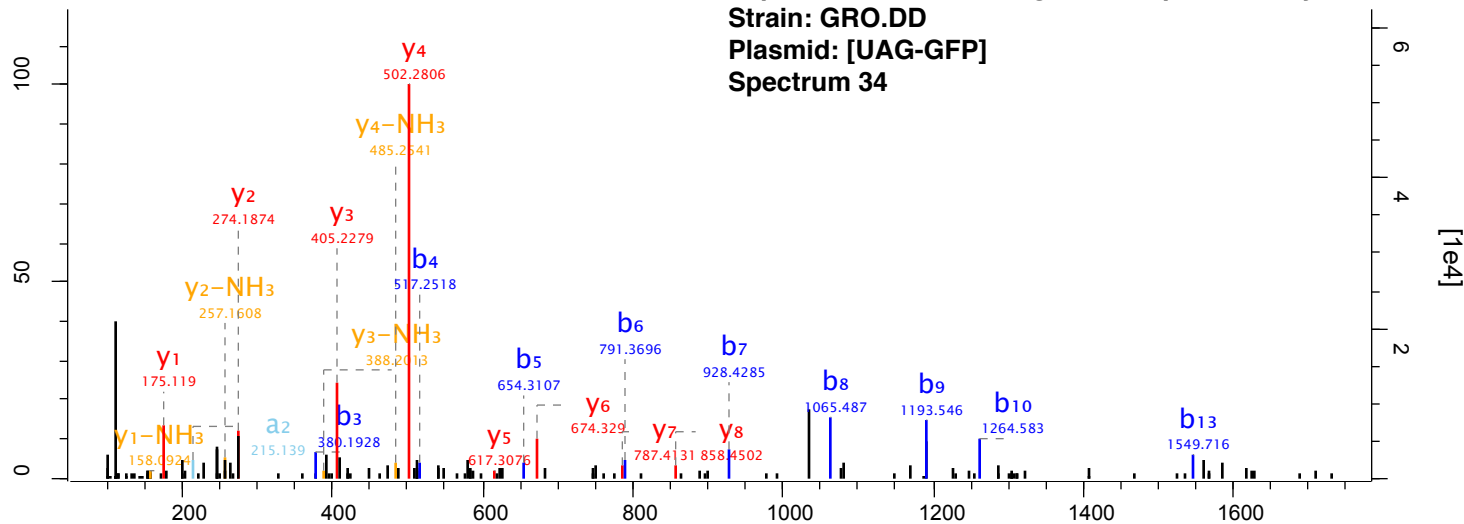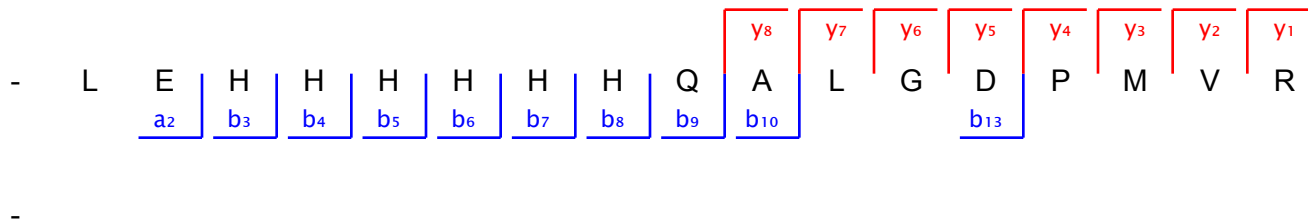

Raw file Scan Method Score m/z  
VOT16-1571 1888 FTMS; HCD 18.58 494.97

**Figure 2 – Supplement File 1**  
**Peptides detected through mass spectrometry**  
**Strain: GRO.DD**  
**Plasmid: [UAG-GFP]**  
**Spectrum 35**

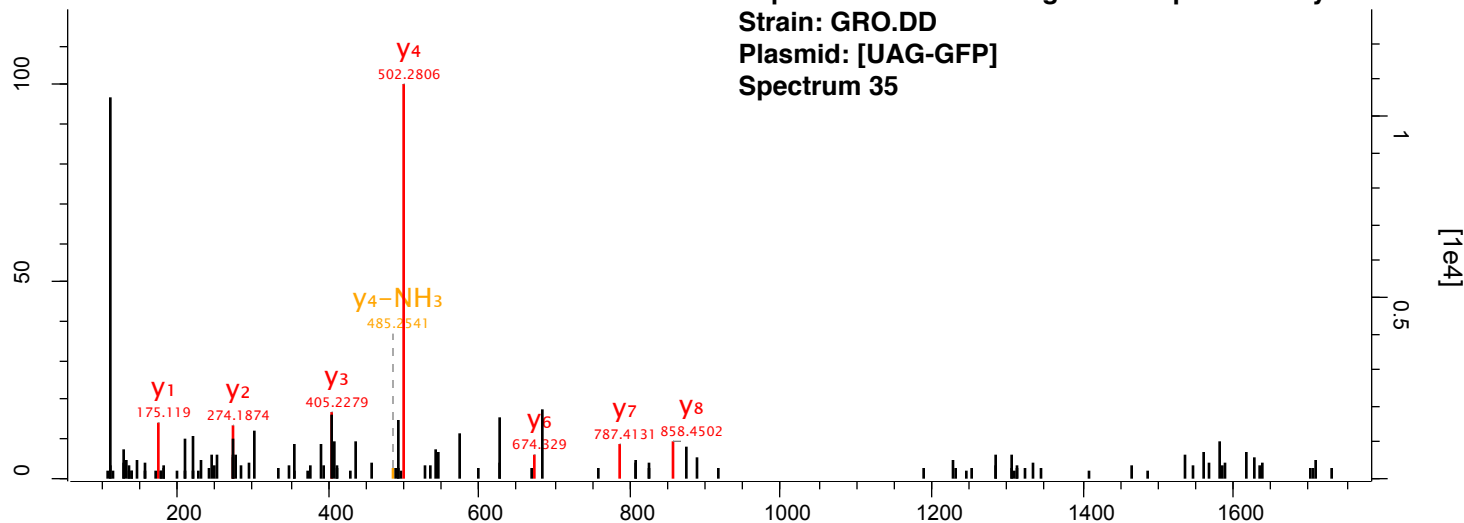

- L E H H H H H H G A L G D P M V R

Peptide sequence: L E H H H H H H G A L G D P M V R. Fragmentation sites are indicated by red brackets above the sequence, labeled y8, y7, y6, y4, y3, y2, and y1.

Raw file Scan Method Score m/z  
 VOT16-1542 1911 FTMS; HCD 91.31 528.24

**Figure 2 – Supplement File 1**  
**Peptides detected through mass spectrometry**  
**Strain: GRO.DD**  
**Plasmid: [UAG-GFP]**  
**Spectrum 36**

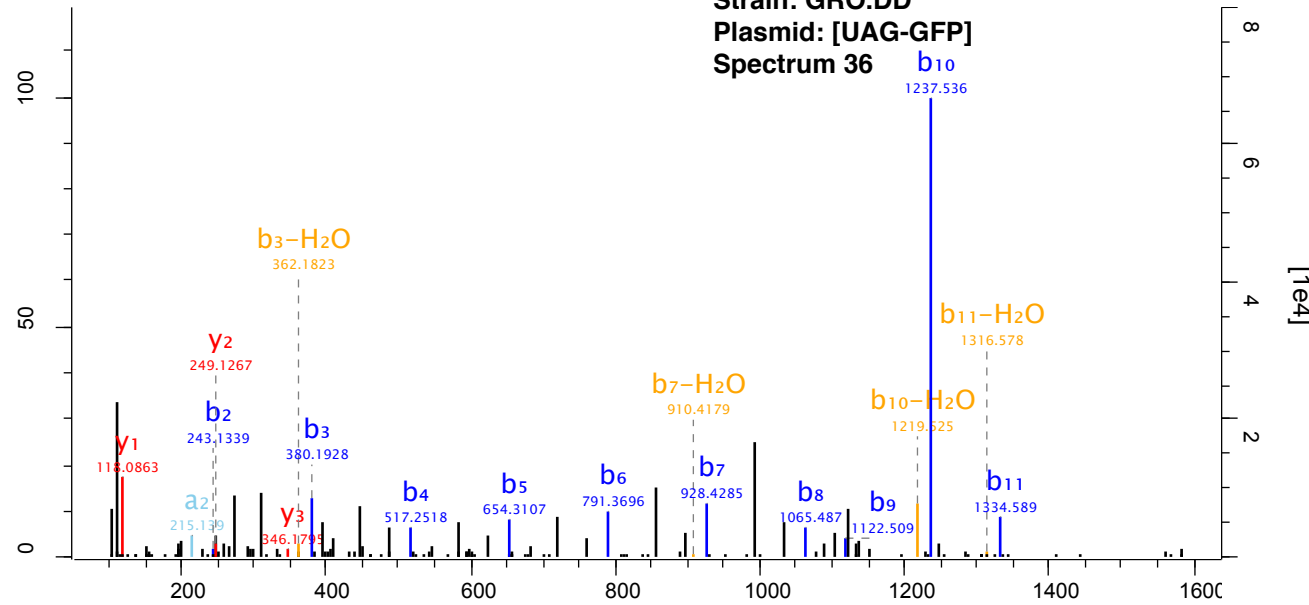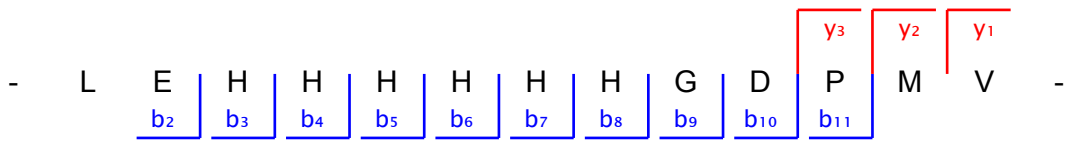

Raw file Scan Method Score m/z  
 VOT16-1571 1955 FTMS; HCD 32.8 633.78

**Figure 2 – Supplement File 1**  
**Peptides detected through mass spectrometry**  
 Strain: GRO.DD  
 Plasmid: [UAG-GFP]  
 Spectrum 37

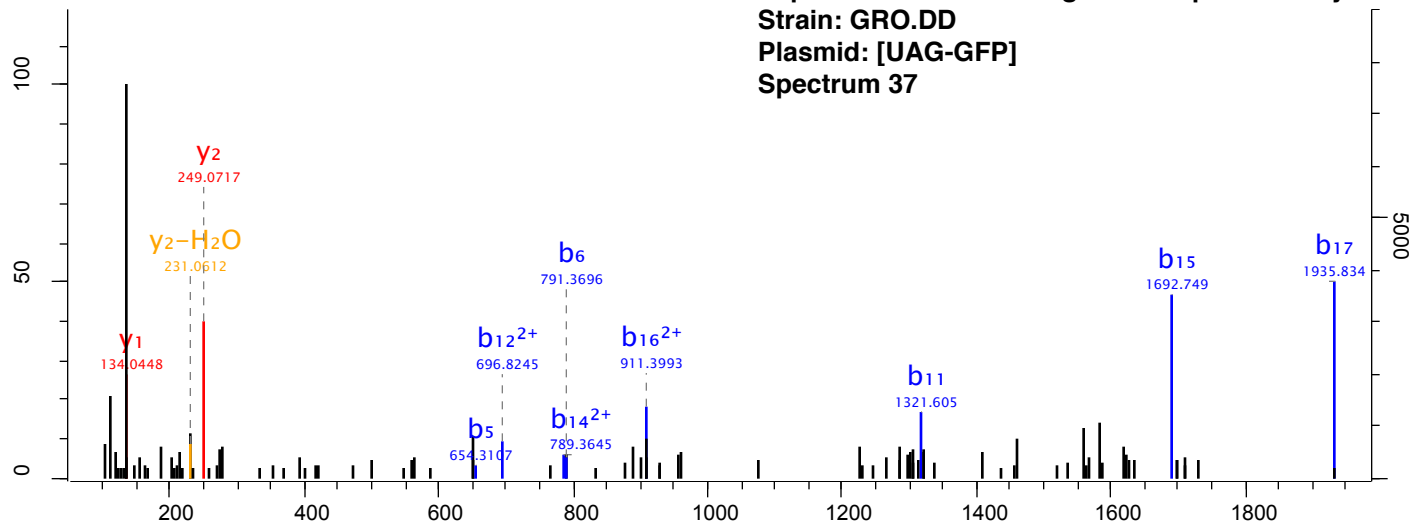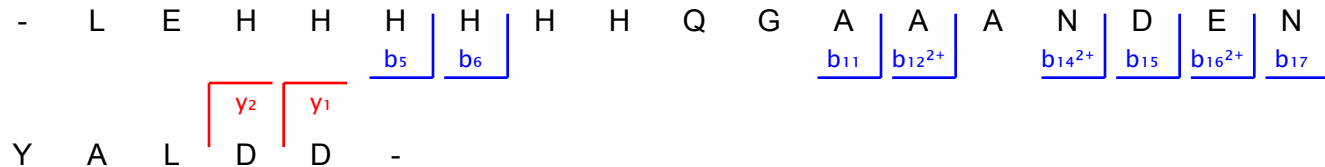

Raw file Scan Method Score m/z  
 VOT16-1571 1968 FTMS; HCD 65.42 806.69

**Figure 2 – Supplement File 1**  
**Peptides detected through mass spectrometry**  
 Strain: GRO.DD  
 Plasmid: [UAG-GFP]  
 Spectrum 38

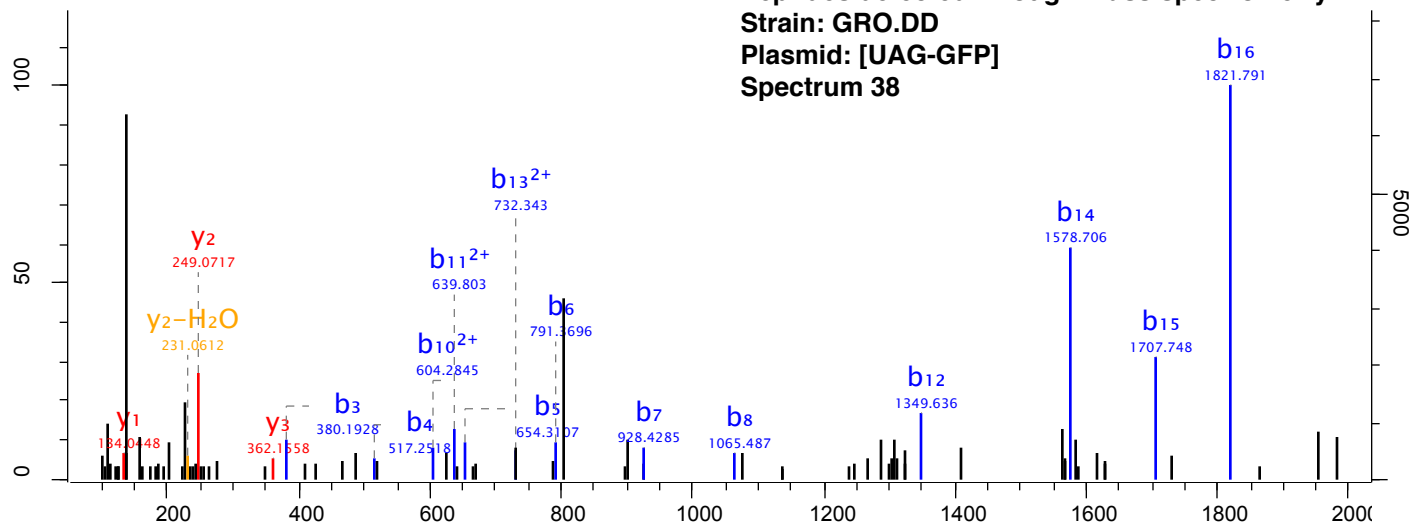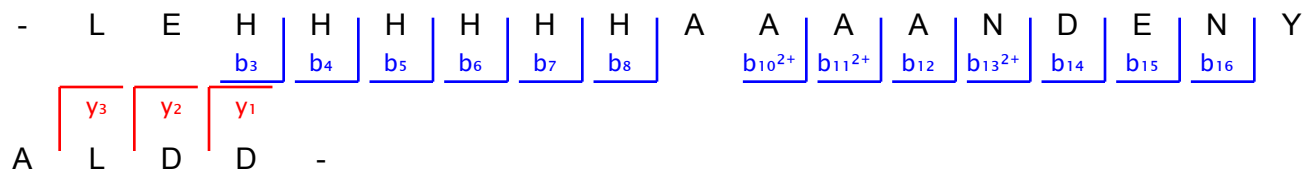

Raw file Scan Method Score m/z  
 VOT16-1571 2125 FTMS; HCD 93.24 481.49

**Figure 2 – Supplement File 1**  
**Peptides detected through mass spectrometry**  
 Strain: GRO.DD  
 Plasmid: [UAG-GFP]  
 Spectrum 39

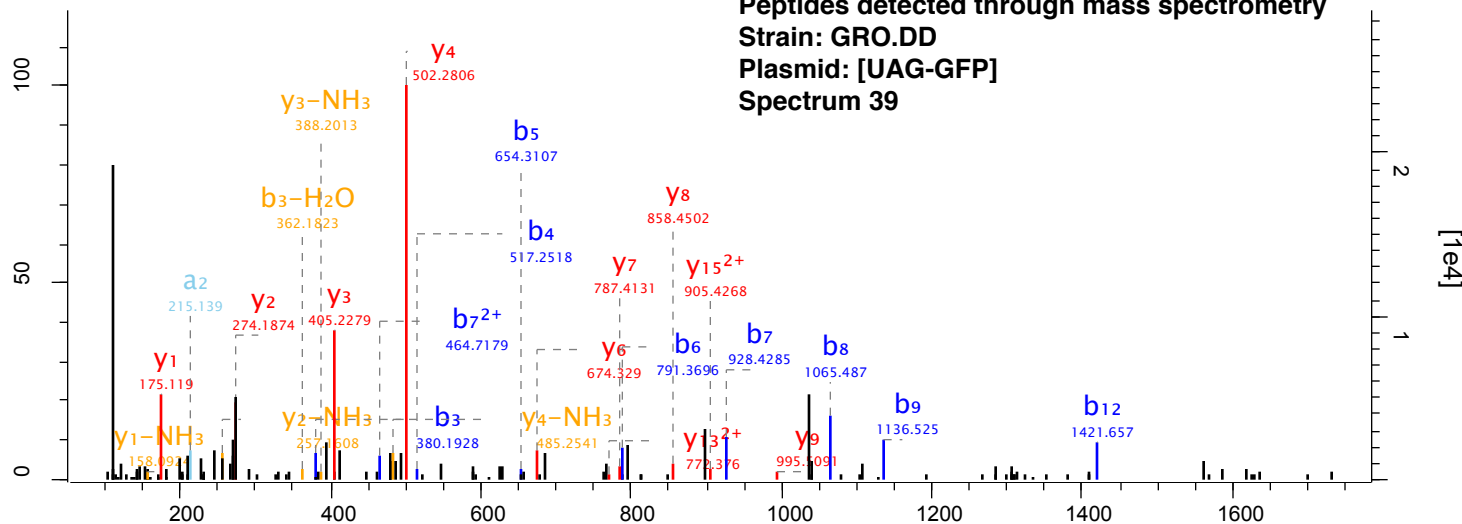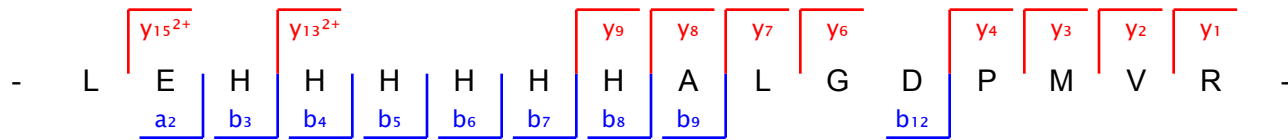

Raw file Scan Method Score m/z  
 VOT16-1542 2156 FTMS; HCD 73.14 605.76

**Figure 2 – Supplement File 1**  
**Peptides detected through mass spectrometry**  
**Strain: GRO.DD**  
**Plasmid: [UAG-GFP]**  
**Spectrum 40**

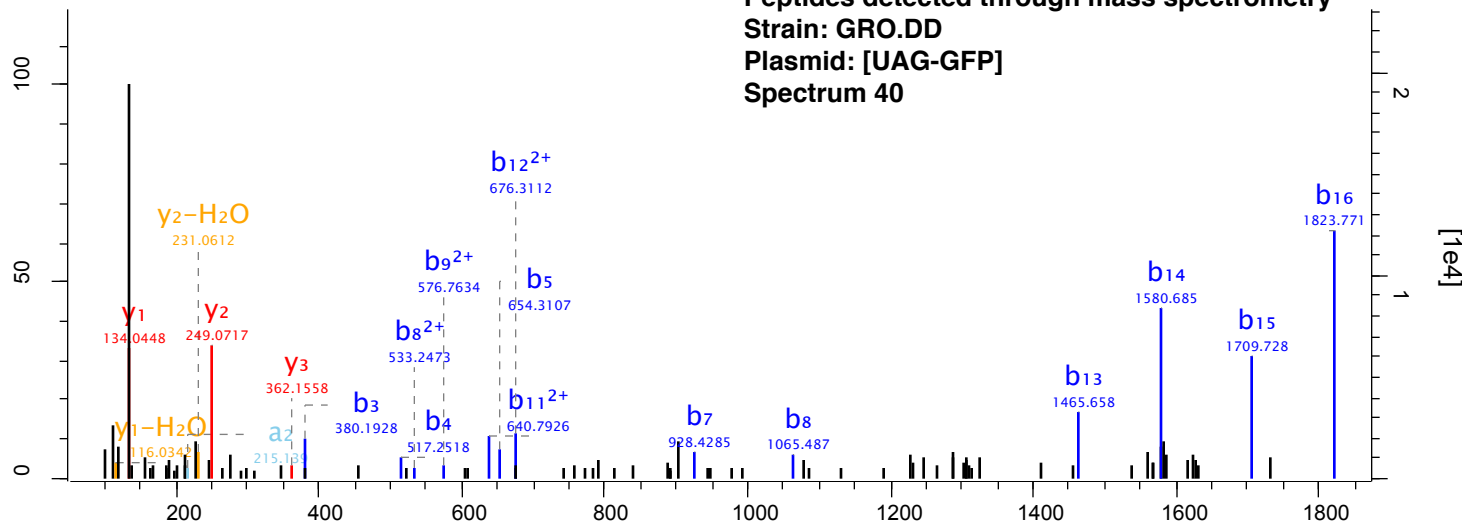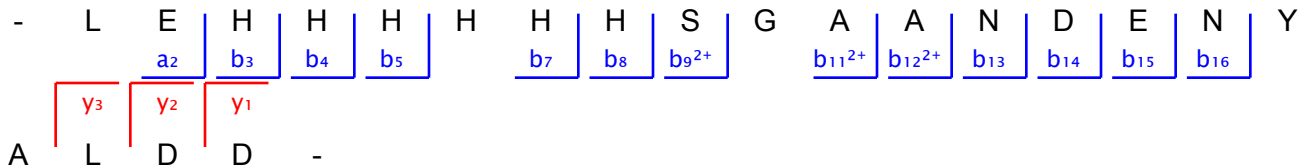



Raw file Scan Method Score m/z  
 VOT16-1542 2210 FTMS; HCD 63.3 612.51

**Figure 2 – Supplement File 1**  
**Peptides detected through mass spectrometry**  
**Strain: GRO.DD**  
**Plasmid: [UAG-GFP]**  
**Spectrum 41**

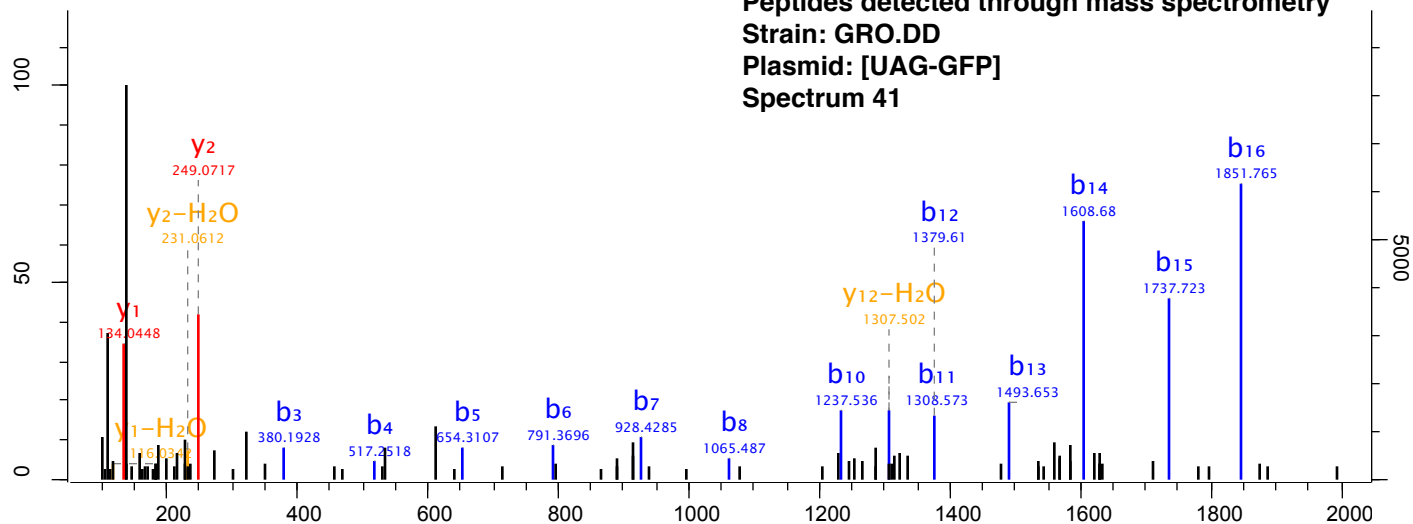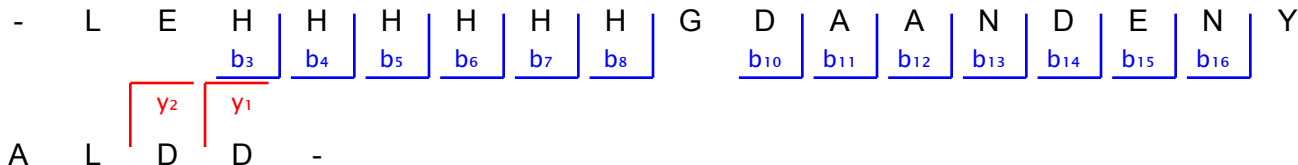

Raw file Scan Method Score m/z  
 VOT16-1542 2228 FTMS; HCD 95.82 481.74

**Figure 2 – Supplement File 1**  
**Peptides detected through mass spectrometry**  
**Strain: GRO.DD**  
**Plasmid: [UAG-GFP]**  
**Spectrum 42**

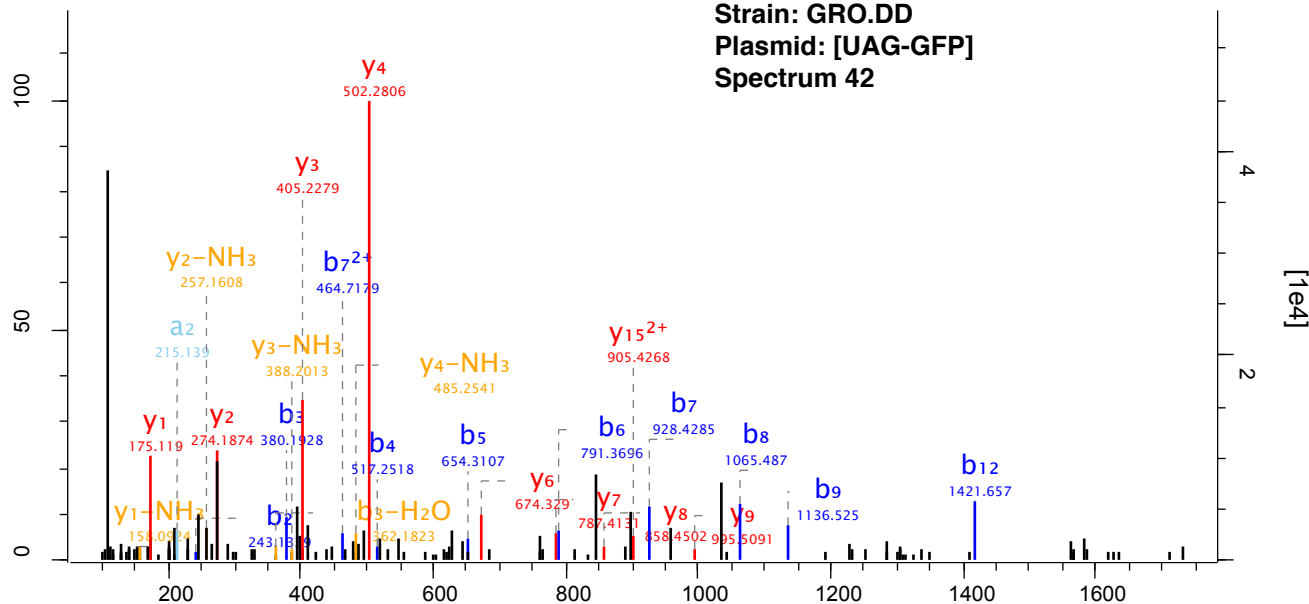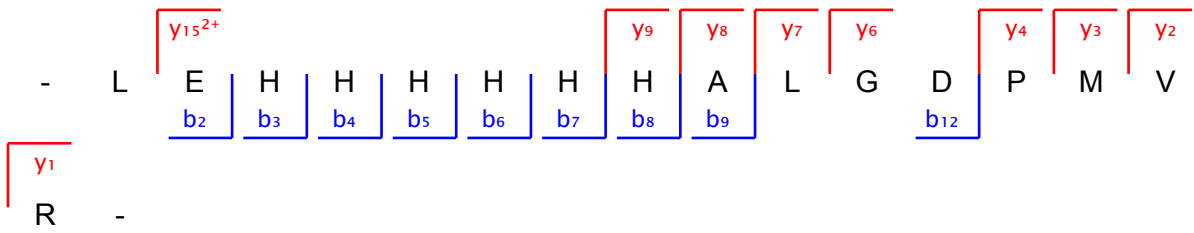

| Raw file   | Scan | Method    | Score | m/z    |
|------------|------|-----------|-------|--------|
| VOT16-1542 | 2228 | FTMS; HCD | 95.82 | 481.74 |

**Figure 2 – Supplement File 1**  
**Peptides detected through mass spectrometry**  
**Strain: GRO.DD**  
**Plasmid: [UAG-GFP]**  
**Spectrum 43**

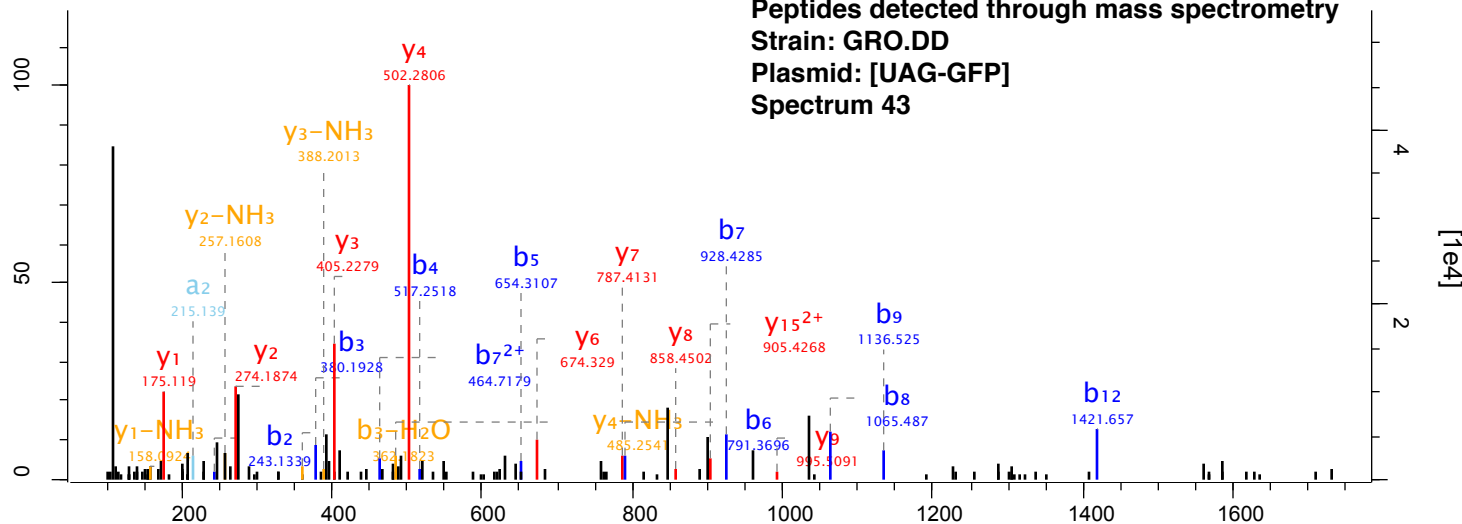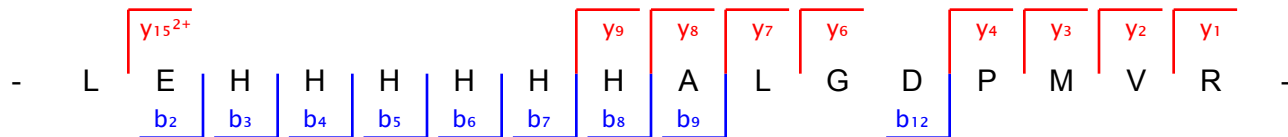

| Raw file   | Scan | Method    | Score  | m/z    |
|------------|------|-----------|--------|--------|
| VOT16-1571 | 3171 | FTMS; HCD | 120.32 | 674.28 |

**Figure 2 – Supplement File 1**  
**Peptides detected through mass spectrometry**  
**Strain: GRO.DD**  
**Plasmid: [UAG-GFP]**  
**Spectrum 44**

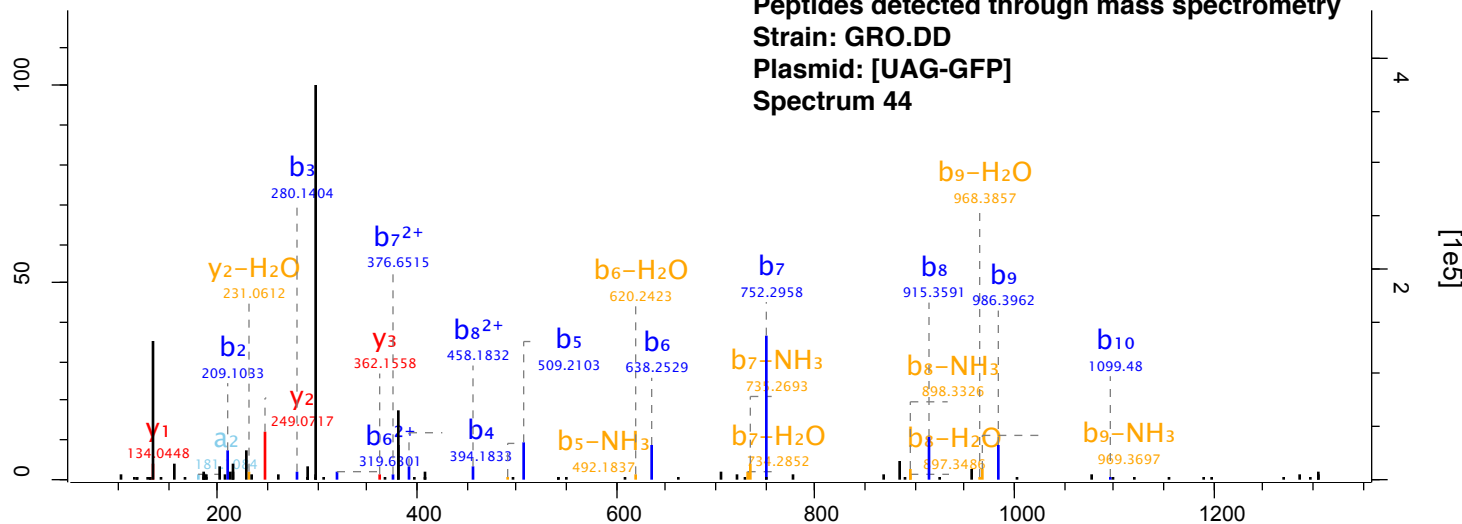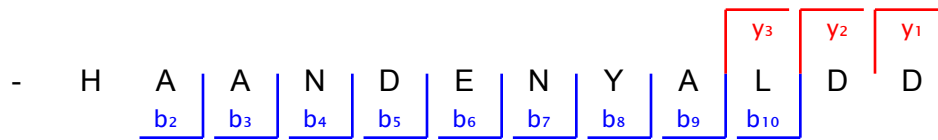

| Raw file   | Scan | Method    | Score | m/z    |
|------------|------|-----------|-------|--------|
| VOT16-1542 | 3264 | FTMS; HCD | 9.57  | 658.54 |

**Figure 2 – Supplement File 1**  
**Peptides detected through mass spectrometry**  
**Strain: GRO.DD**  
**Plasmid: [UAG-GFP]**  
**Spectrum 45**

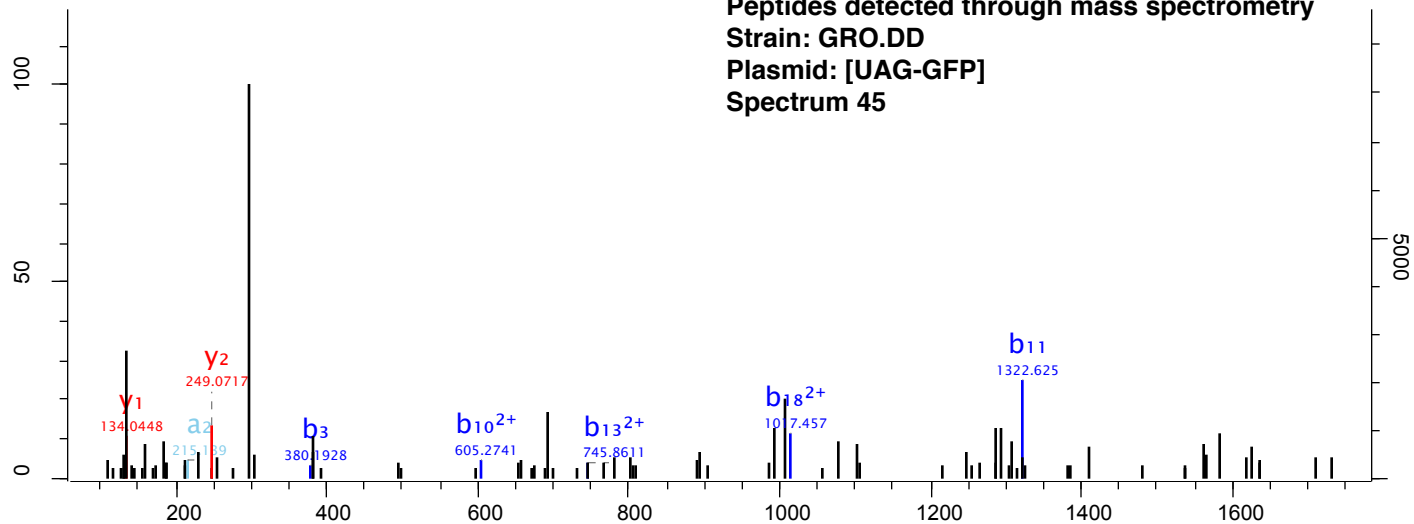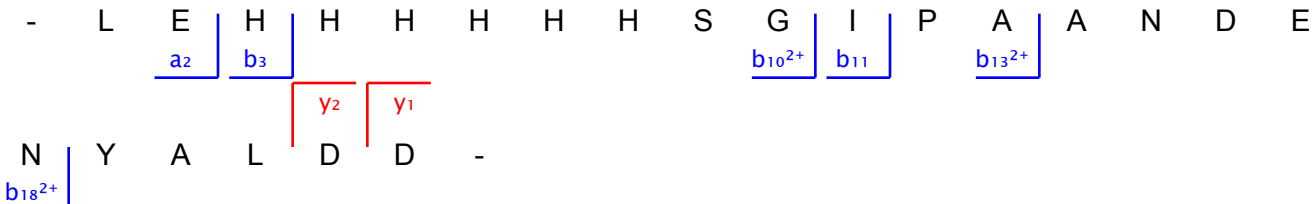

| Raw file   | Scan | Method    | Score | m/z    |
|------------|------|-----------|-------|--------|
| VOT16-1542 | 3771 | FTMS; HCD | 15.27 | 519.74 |

**Figure 2 – Supplement File 1**  
**Peptides detected through mass spectrometry**  
**Strain: GRO.DD**  
**Plasmid: [UAG-GFP]**  
**Spectrum 46**

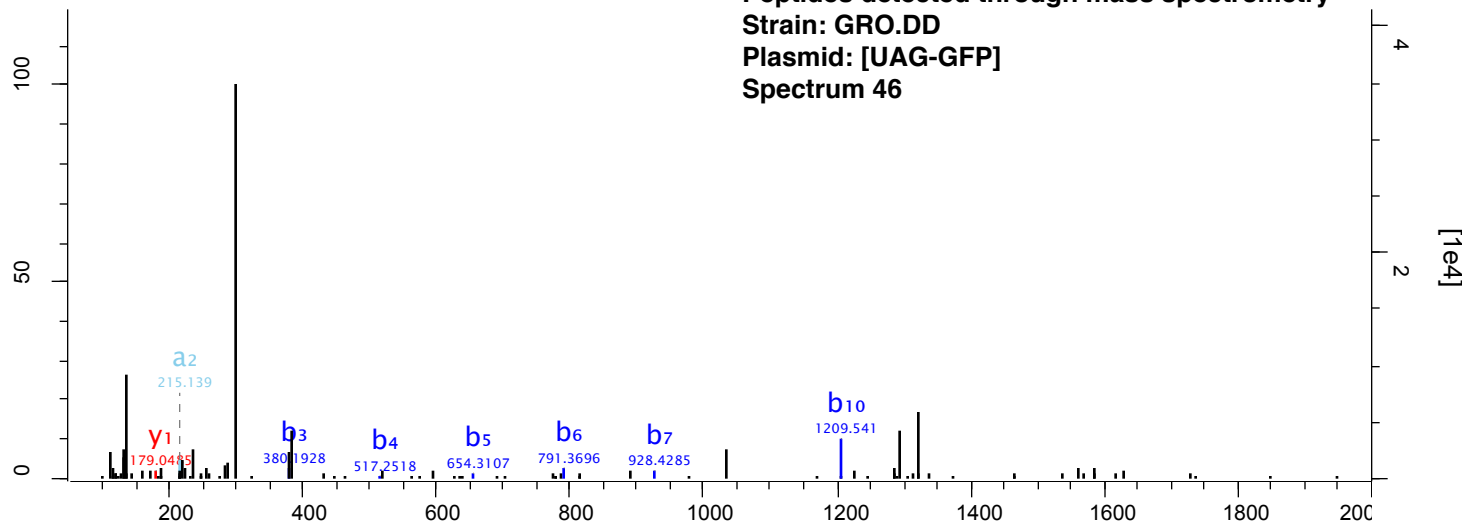

- L E H H H H H H G S G I P W Y A C

-

-

Fragmentation labels below the sequence:

- a2** (blue box) under E
- b3** (blue box) under H
- b4** (blue box) under H
- b5** (blue box) under H
- b6** (blue box) under H
- b7** (blue box) under H
- b10** (blue box) under S
- y1** (red box) under C

Raw file Scan Method Score m/z  
 VOT16-1542 3956 FTMS; HCD 47.04 673.64

**Figure 2 – Supplement File 1**  
**Peptides detected through mass spectrometry**  
 Strain: GRO.DD  
 Plasmid: [UAG-GFP]  
 Spectrum 47

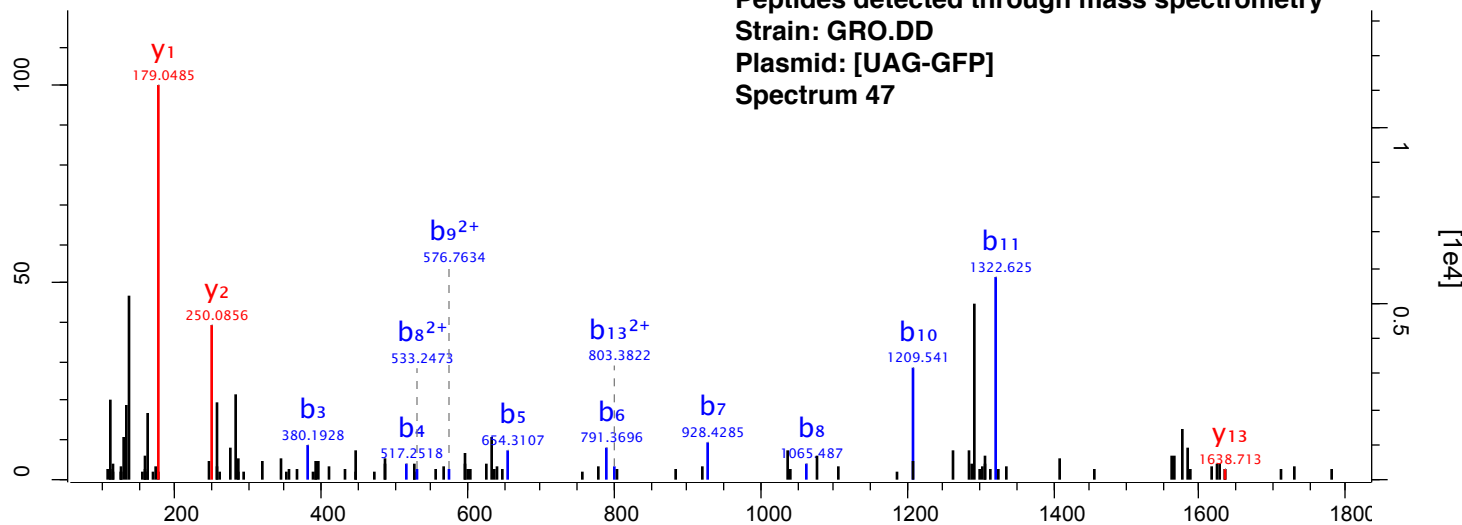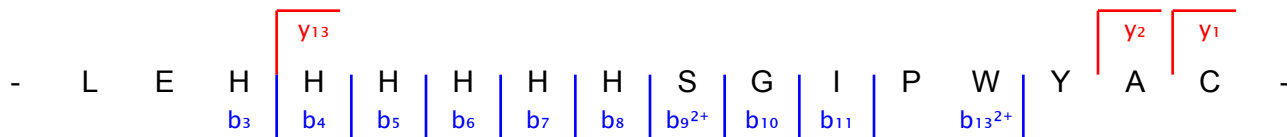

Supplement: elife-34878-supp2.pdf [file elife-34878-supp2.pdf]
